# Supplementary material for: Satellitome landscape analysis of Megaleporinus macrocephalus (Teleostei, Anostomidae) reveals intense accumulation of satellite sequences on the heteromorphic sex chromosome
Source: PubMed Central journal article supplement (PMC6458115; doi:10.1038/s41598-019-42383-8), 2019-04-10
Supplement: 41598_2019_42383_MOESM1_ESM.pdf [file 41598_2019_42383_MOESM1_ESM.pdf]

## Supplementary information

### **Satellitome landscape analysis of *Megaleporinus macrocephalus* (Teleostei, Anostomidae) reveals intense accumulation of satellite sequences on the heteromorphic sex chromosome**

Ricardo Utsunomia<sup>1</sup>, Duílio Mazzoni Zerbinato de Andrade Silva<sup>1</sup>, Francisco J. Ruiz-Ruano<sup>2</sup>, Caio Augusto Gomes Goes<sup>3</sup>, Silvana Melo<sup>1</sup>, Lucas Peres Ramos<sup>1</sup>, Claudio Oliveira<sup>1</sup>, Fábio Porto Foresti<sup>3</sup>, Fausto Foresti<sup>1</sup>, Diogo Teruo Hashimoto<sup>4</sup>

<sup>1</sup> Departamento de Morfologia, Instituto de Biociências, Universidade Estadual Paulista - UNESP, Distrito de Rubião Junior, s/n, 18618-970, Botucatu, SP, Brazil. <sup>2</sup> Departamento de Genética, Universidad de Granada, 18071, Granada, Spain. <sup>3</sup> Departamento de Ciências Biológicas, Faculdade de Ciências, Universidade Estadual Paulista - UNESP, Campus de Bauru, 17033-360, Bauru, SP, Brazil. <sup>4</sup>CAUNESP, Universidade Estadual Paulista - UNESP, Campus Jaboticabal, 14884-900, Jaboticabal, SP, Brazil. Correspondence and requests for materials should be addressed to R.U. (email: ricardo.utsunomia@unesp.br)

---

### MmaSat9-53

---

Male - *M. macrocephalus*

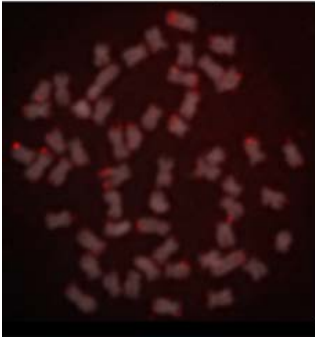

Female - *M. macrocephalus*

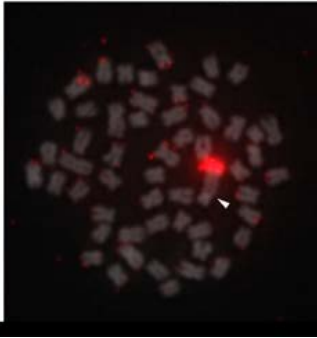

Female - *M. obtusidens*

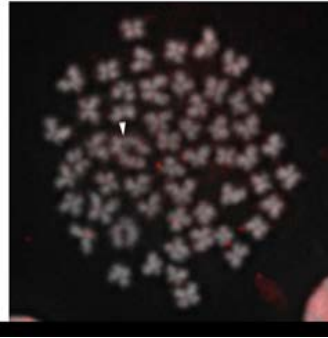

---

### MmaSat17-72

---

Male - *M. macrocephalus*

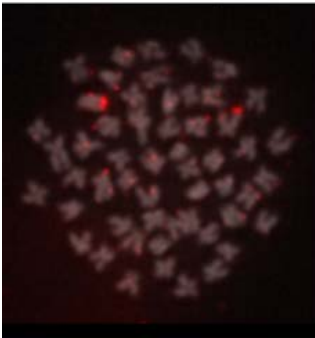

Female - *M. macrocephalus*

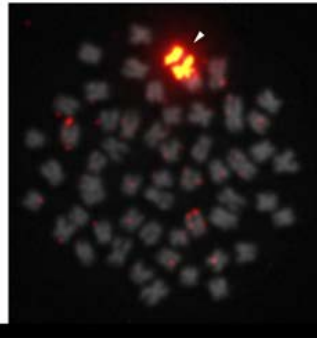

Female - *M. obtusidens*

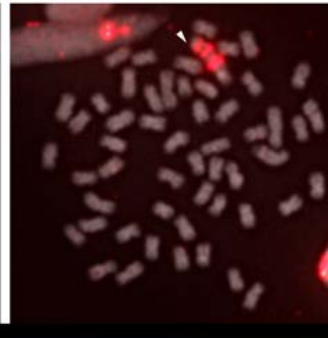

---

### MmaSat29-32

---

Male - *M. macrocephalus*

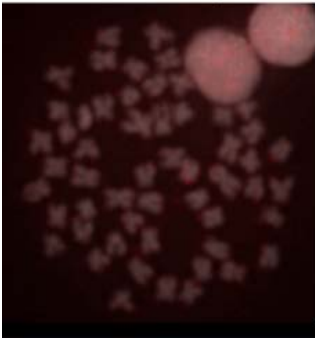

Female - *M. macrocephalus*

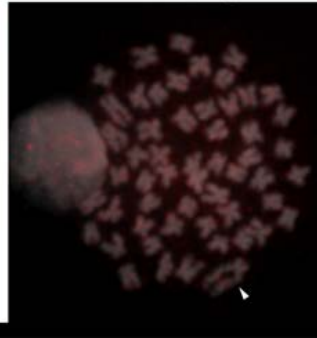

Female - *M. obtusidens*

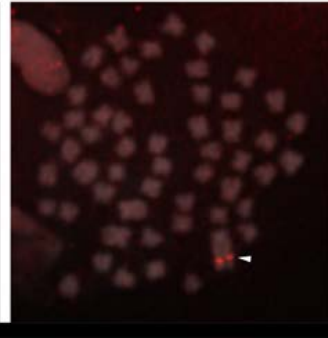

---

### MmaSat36-74

---

Male - *M. macrocephalus*

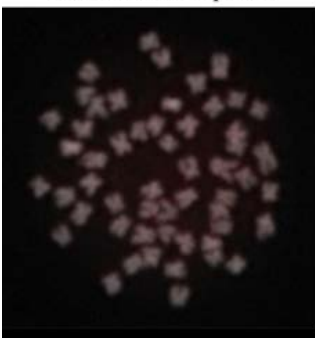

Female - *M. macrocephalus*

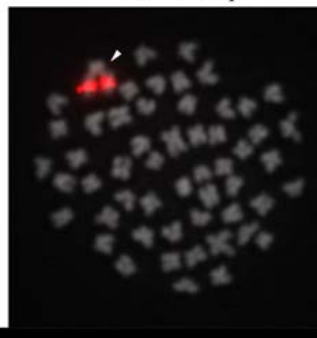

Female - *M. obtusidens*

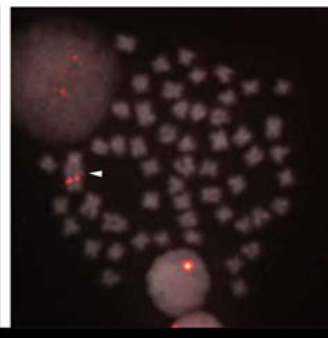

---

**MmaSat48-1298**

---

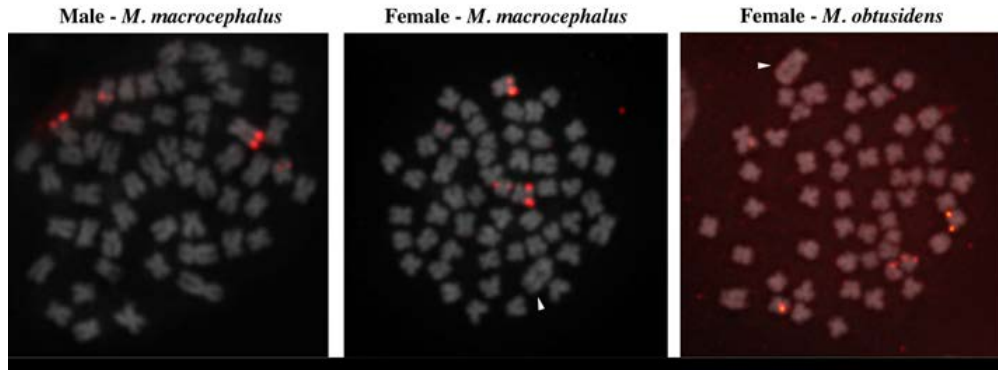

---

**MmaSat58-71**

---

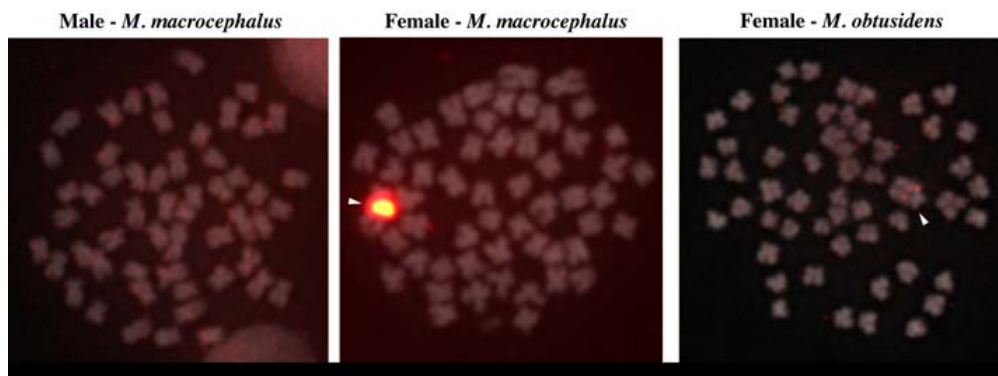

---

**MmaSat61-33**

---

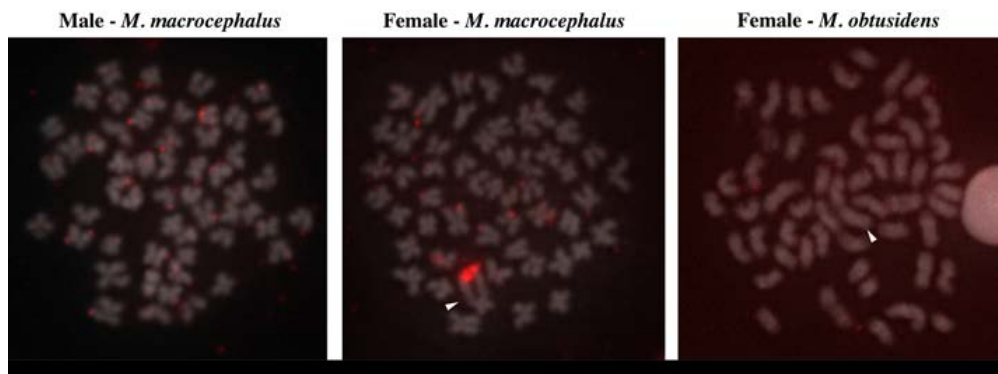

---

**MmaSat63-47**

---

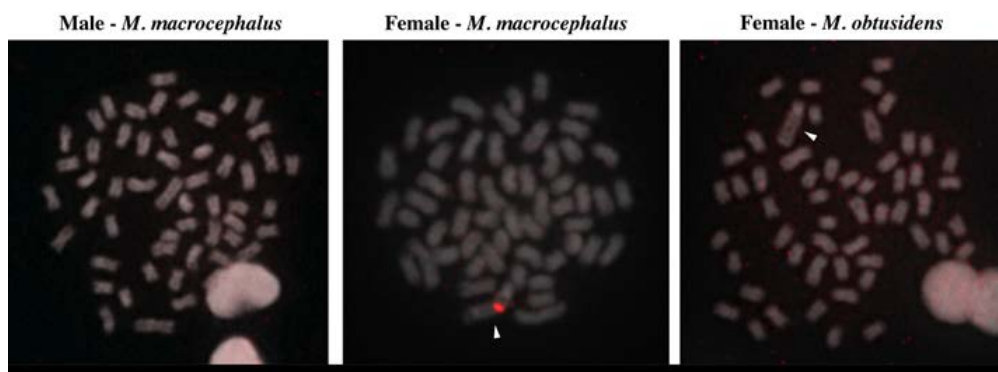

---

**MmaSat92-46**

---

Male - *M. macrocephalus*

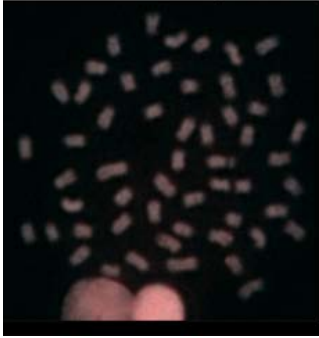

Female - *M. macrocephalus*

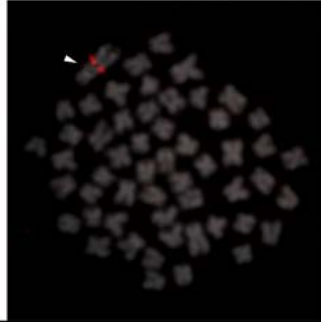

Female - *M. obtusidens*

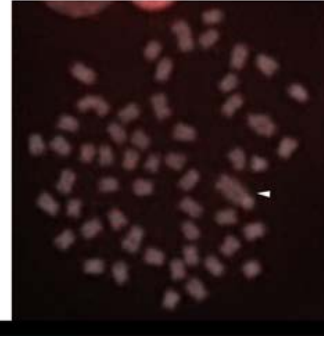

---

**MmaSat97-39**

---

Male - *M. macrocephalus*

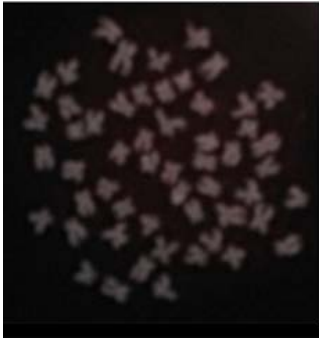

Female - *M. macrocephalus*

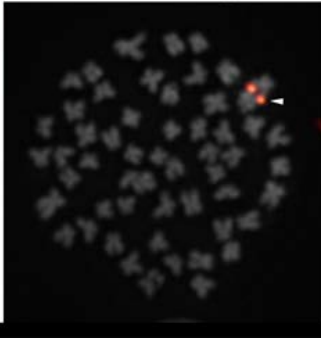

Female - *M. obtusidens*

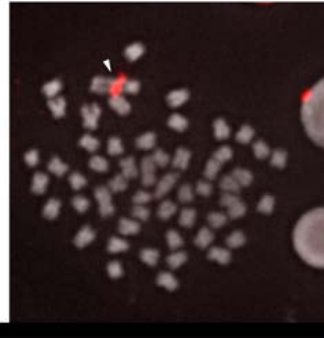

---

**MmaSat98-37**

---

Male - *M. macrocephalus*

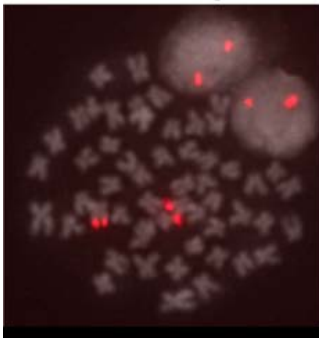

Female - *M. macrocephalus*

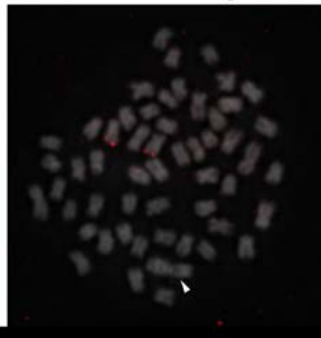

Female - *M. obtusidens*

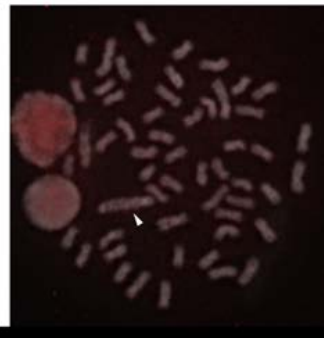

---

**MmaSat99-31**

---

Male - *M. macrocephalus*

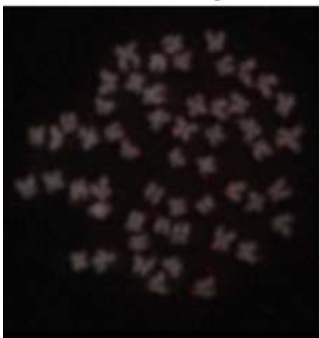

Female - *M. macrocephalus*

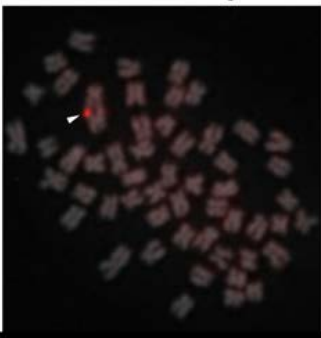

Female - *M. obtusidens*

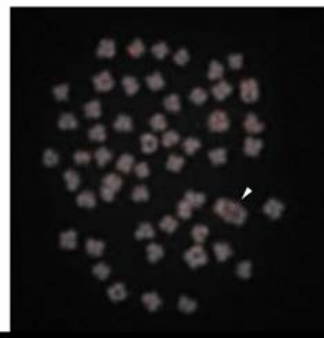

---

**MmaSat118-66**

---

Male - *M. macrocephalus*

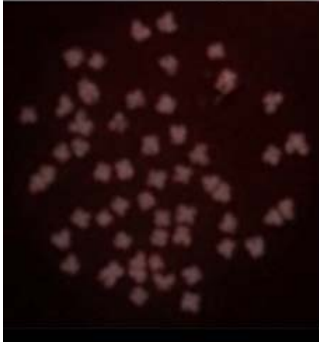

Female - *M. macrocephalus*

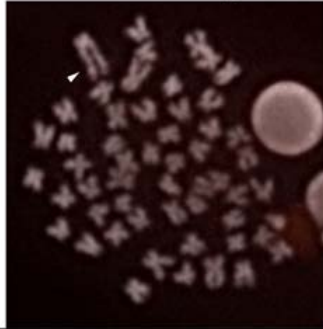

Female - *M. obtusidens*

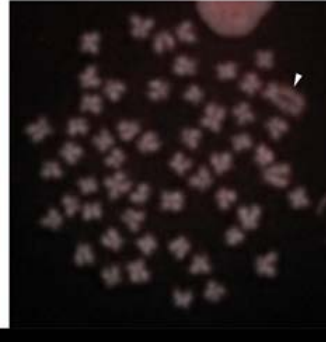

---

**MmaSat122-54**

---

Male - *M. macrocephalus*

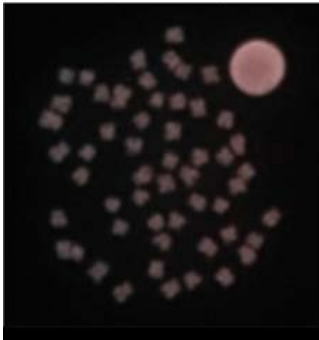

Female - *M. macrocephalus*

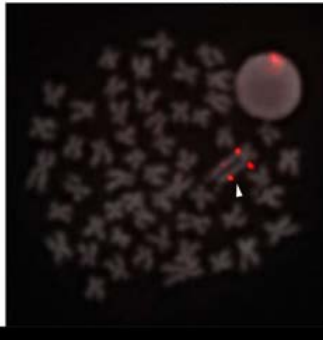

Female - *M. obtusidens*

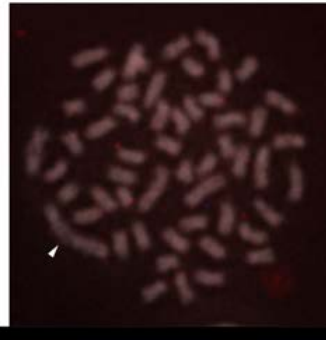

---

**MmaSat127-42**

---

Male - *M. macrocephalus*

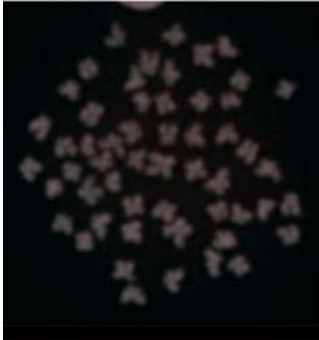

Female - *M. macrocephalus*

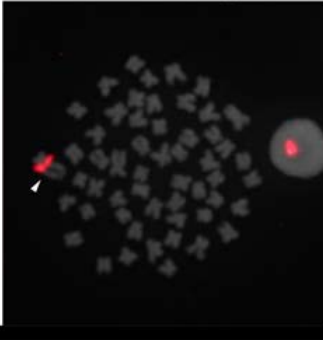

Female - *M. obtusidens*

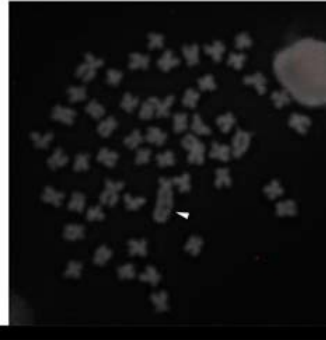

---

**MmaSat128-38**

---

Male - *M. macrocephalus*

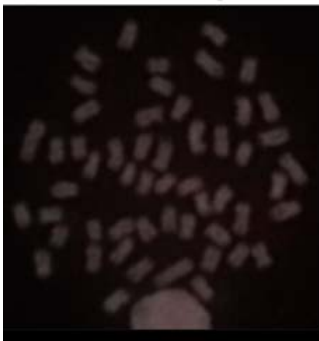

Female - *M. macrocephalus*

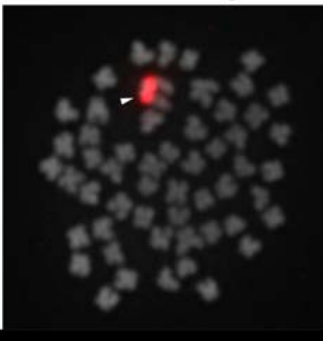

Female - *M. obtusidens*

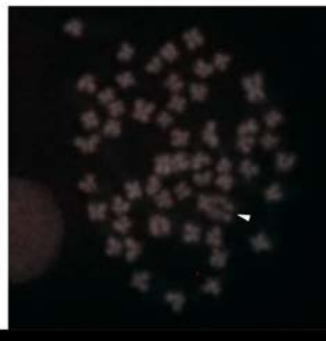

---

**MmaSat139-47**

---

Male - *M. macrocephalus*

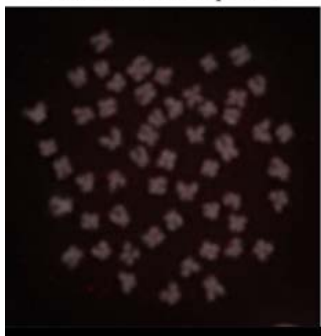

Female - *M. macrocephalus*

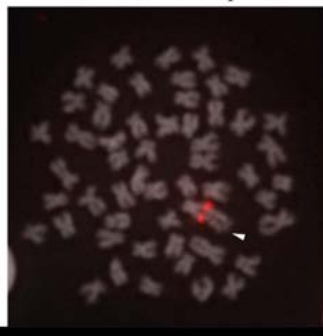

Female - *M. obtusidens*

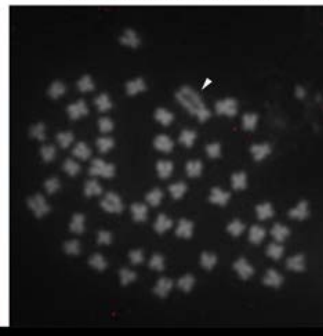

---

**MmaSat145-67**

---

Male - *M. macrocephalus*

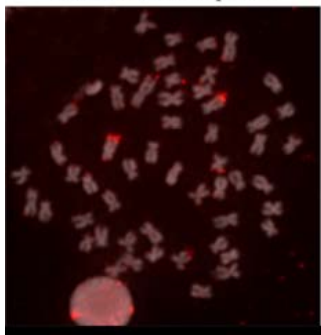

Female - *M. macrocephalus*

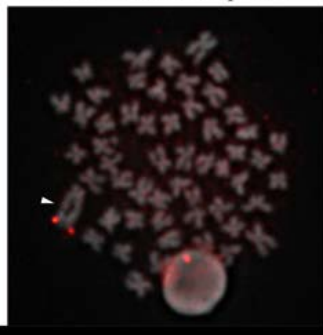

Female - *M. obtusidens*

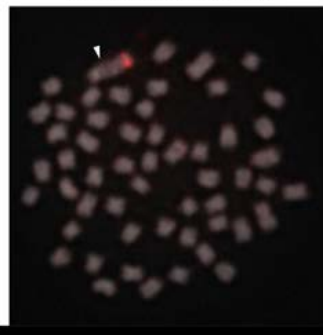

---

**MmaSat150-31**

---

Male - *M. macrocephalus*

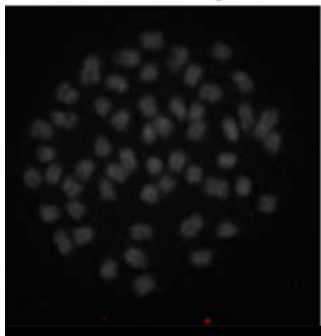

Female - *M. macrocephalus*

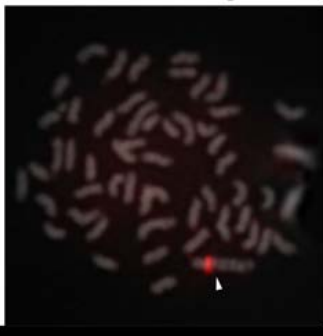

Female - *M. obtusidens*

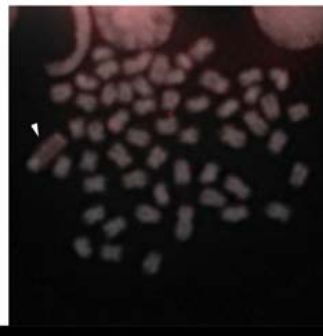

---

**MmaSat151-33**

---

Male - *M. macrocephalus*

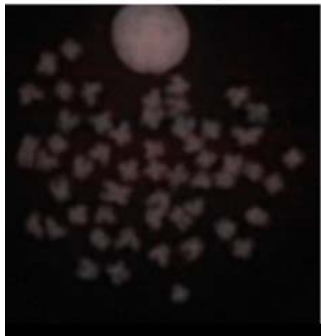

Female - *M. macrocephalus*

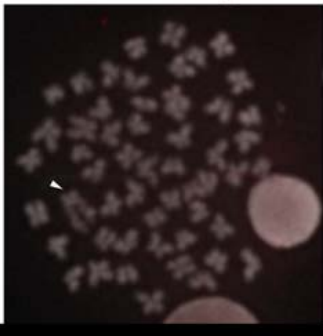

Female - *M. obtusidens*

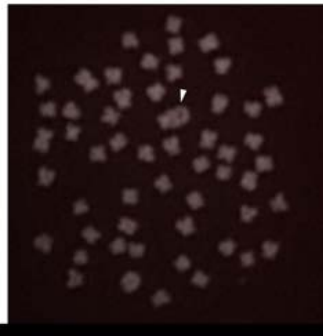

---

**MmaSat152-31**

---

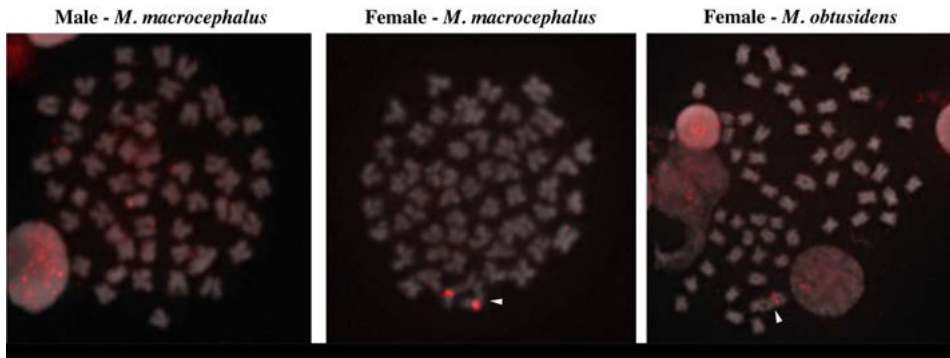

---

**MmaSat153-40**

---

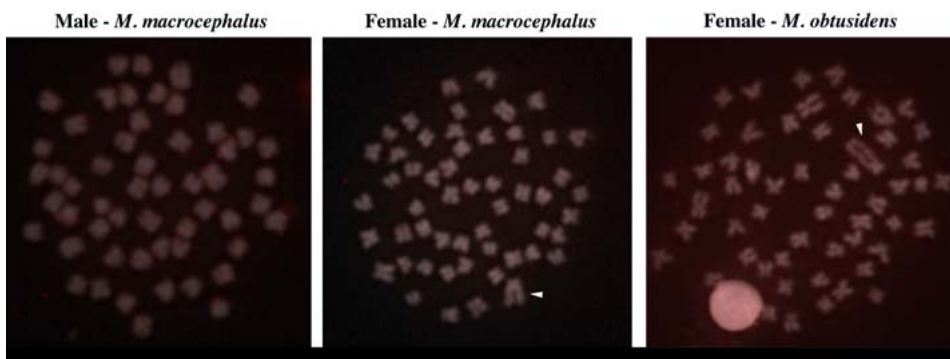

---

**MmaSat154-30**

---

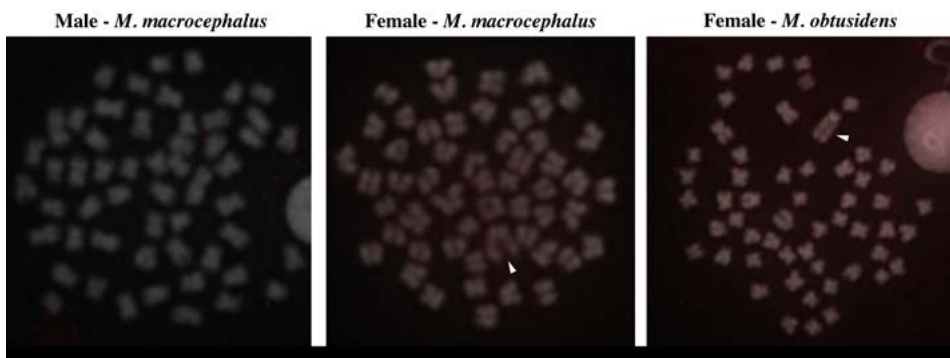

---

**MmaSat155-71**

---

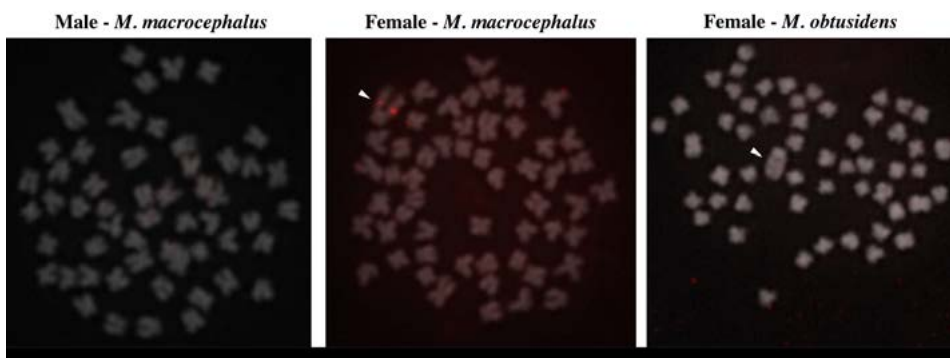

---

### MmaSat158-39

---

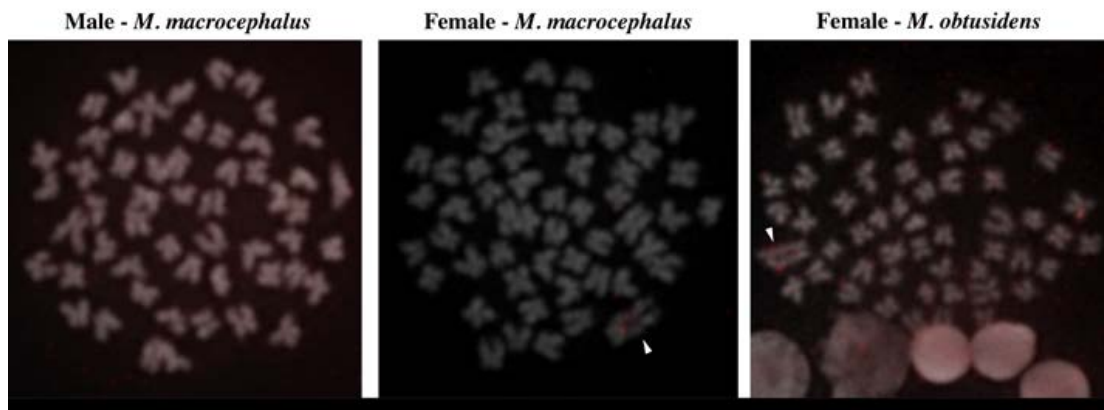

---

### MmaSat162-48

---

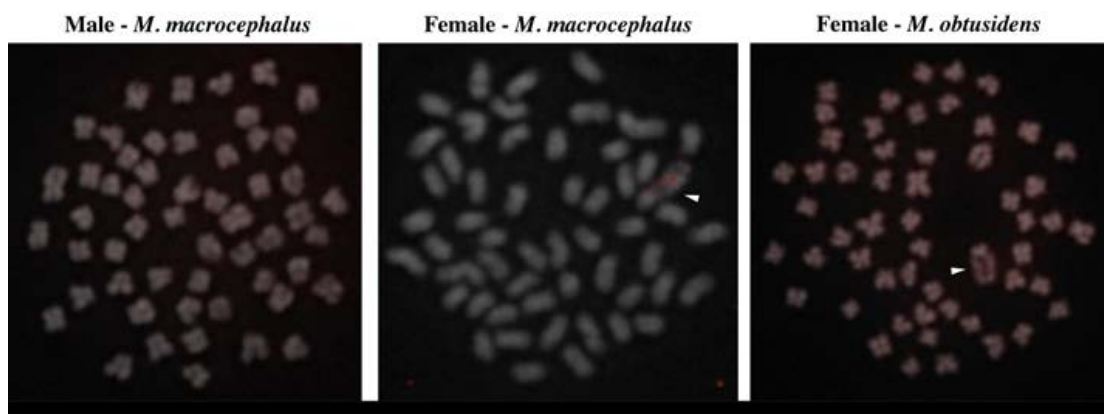

**Supplementary Figure S1:** Metaphase plates from *M. macrocephalus* (males and females) and *M. obtusidens* (females) after FISH identification of the selected satDNA families.



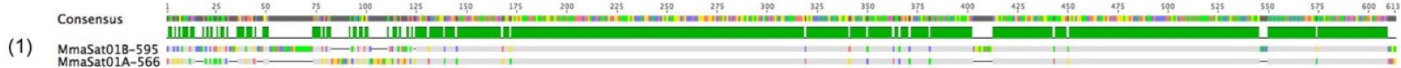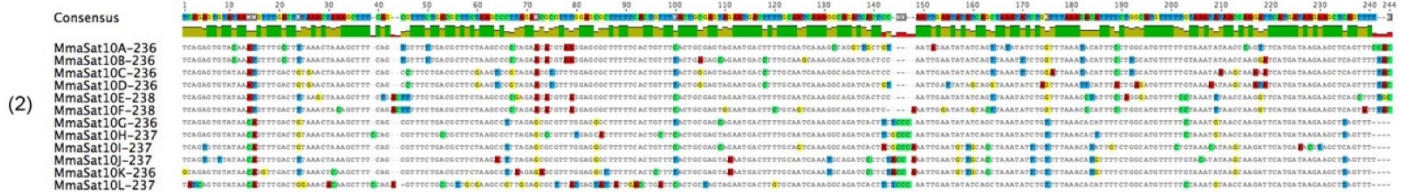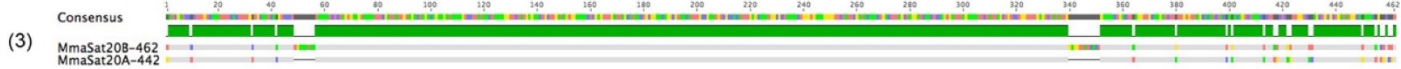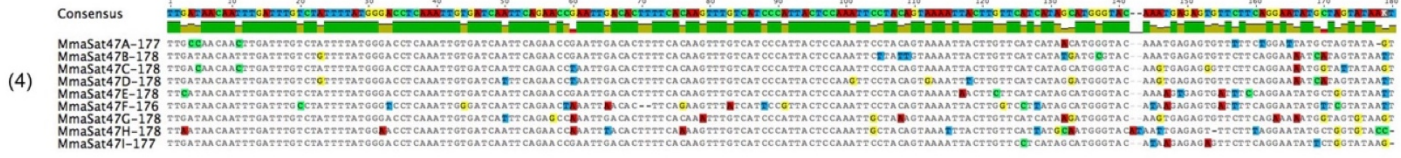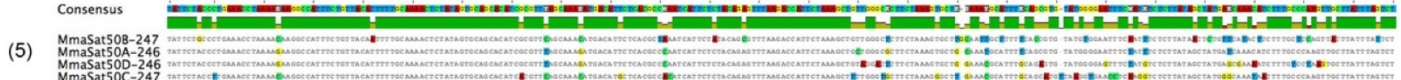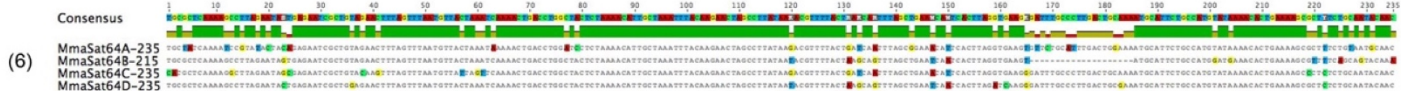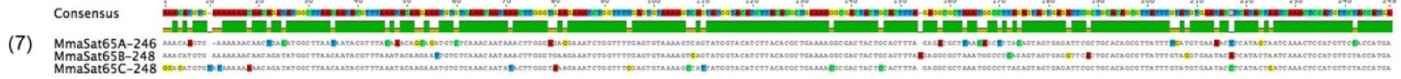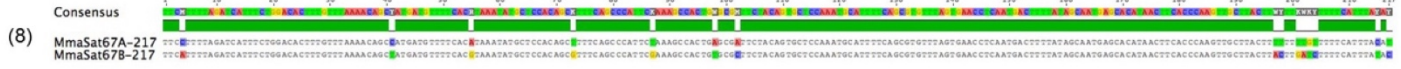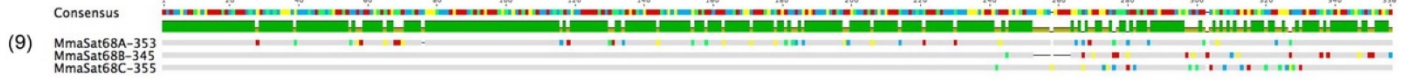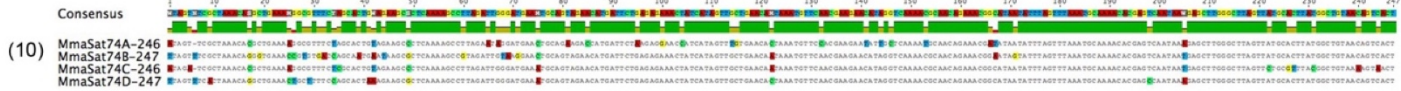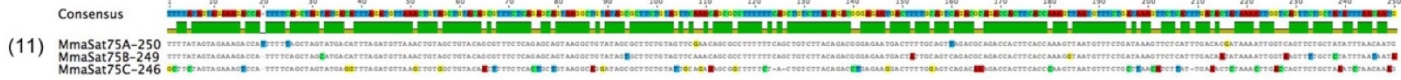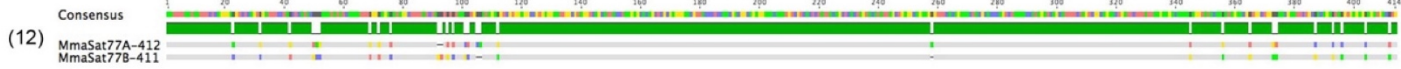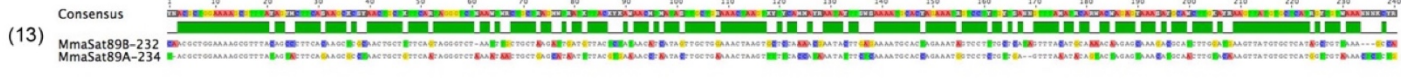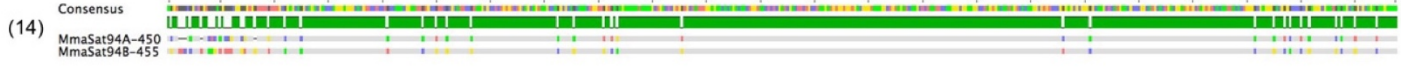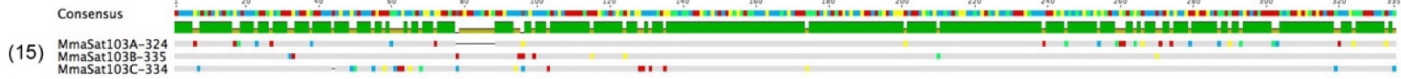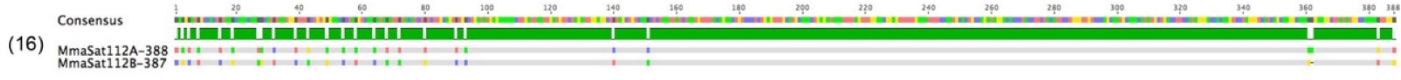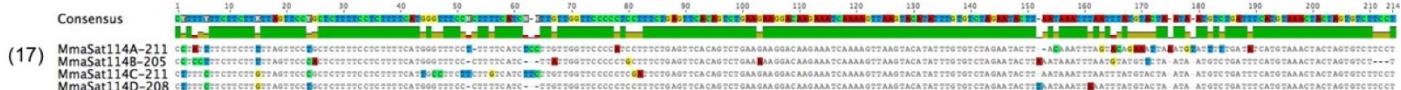

- (18) Consensus  
MmaSat123A-152  
MmaSat123B-152  
MmaSat123C-152  
MmaSat123D-152  
MmaSat123E-152  
MmaSat123F-152  
MmaSat123G-152  
MmaSat123H-152  
MmaSat123I-152  
MmaSat123J-152  
MmaSat123K-152  
MmaSat123L-152  
MmaSat123M-152  
MmaSat123N-152  
MmaSat123O-152  
MmaSat123P-152  
MmaSat123Q-152  
MmaSat123R-152  
MmaSat123S-152  
MmaSat123T-152  
MmaSat123U-152  
MmaSat123V-152  
MmaSat123W-152  
MmaSat123X-152  
MmaSat123Y-152  
MmaSat123Z-152
- (19) Consensus  
MmaSat126A-178  
MmaSat126B-178  
MmaSat126C-178  
MmaSat126D-178  
MmaSat126E-178  
MmaSat126F-178  
MmaSat126G-178  
MmaSat126H-178  
MmaSat126I-178  
MmaSat126J-178  
MmaSat126K-178  
MmaSat126L-178  
MmaSat126M-178  
MmaSat126N-178  
MmaSat126O-178  
MmaSat126P-178  
MmaSat126Q-178  
MmaSat126R-178  
MmaSat126S-178  
MmaSat126T-178  
MmaSat126U-178  
MmaSat126V-178  
MmaSat126W-178  
MmaSat126X-178  
MmaSat126Y-178  
MmaSat126Z-178
- (20) Consensus  
MmaSat04A-20  
MmaSat04B-20  
MmaSat04C-20
- (21) Consensus  
MmaSat07A-42  
MmaSat07B-42  
MmaSat07C-42
- (22) Consensus  
MmaSat08A-45  
MmaSat08B-48  
MmaSat08C-46  
MmaSat08D-48
- (23) Consensus  
MmaSat09A-53  
MmaSat09B-53  
MmaSat09C-53  
MmaSat09D-53  
MmaSat09E-51
- (24) Consensus  
MmaSat12A-50  
MmaSat12B-50  
MmaSat12C-50  
MmaSat12D-52
- (25) Consensus  
MmaSat13A-45  
MmaSat13B-45  
MmaSat13C-45  
MmaSat13D-45
- (26) Consensus  
MmaSat15A-39  
MmaSat15B-39  
MmaSat15C-39  
MmaSat15D-39  
MmaSat15E-36  
MmaSat15F-39  
MmaSat15G-39  
MmaSat15H-42  
MmaSat15I-39  
MmaSat15J-39  
MmaSat15K-36  
MmaSat15L-39  
MmaSat15M-39  
MmaSat15N-39
- (27) Consensus  
MmaSat17A-72  
MmaSat17B-63  
MmaSat17C-74  
MmaSat17D-64  
MmaSat17E-72  
MmaSat17F-71
- (28) Consensus  
MmaSat18A-62  
MmaSat18B-61  
MmaSat18C-62  
MmaSat18D-61
- (29) Consensus  
MmaSat21A-27  
MmaSat21B-27  
MmaSat21C-27  
MmaSat21D-27  
MmaSat21E-27  
MmaSat21F-27  
MmaSat21G-27  
MmaSat21H-27  
MmaSat21I-29  
MmaSat21J-27
- (30) Consensus  
MmaSat22A-41  
MmaSat22B-41
- (31) Consensus  
MmaSat23A-17  
MmaSat23B-17
- (32) Consensus  
MmaSat26A-25  
MmaSat26B-25  
MmaSat26C-25  
MmaSat26D-23

Consensus  
MmaSat27A-67  
MmaSat27B-66  
MmaSat27C-67  
MmaSat27D-67

Consensus  
MmaSat29A-32  
MmaSat29B-34  
MmaSat29C-32  
MmaSat29D-30  
MmaSat29E-31  
MmaSat29F-30  
MmaSat29G-32  
MmaSat29H-32

Consensus  
MmaSat30A-38  
MmaSat30B-38  
MmaSat30C-38  
MmaSat30D-38  
MmaSat30E-38  
MmaSat30F-38  
MmaSat30G-38  
MmaSat30H-38  
MmaSat30I-38  
MmaSat30J-38  
MmaSat30K-38  
MmaSat30L-38  
MmaSat30M-38  
MmaSat30N-36  
MmaSat30O-36  
MmaSat30P-38  
MmaSat30Q-38  
MmaSat30R-38  
MmaSat30S-38  
MmaSat30T-38  
MmaSat30U-38  
MmaSat30V-38  
MmaSat30W-38  
MmaSat30X-38  
MmaSat30Y-38  
MmaSat30Z-38  
MmaSat30A'-38  
MmaSat30B'-38

Consensus  
MmaSat32A-33  
MmaSat32B-33

Consensus  
MmaSat33A-49  
MmaSat33B-49  
MmaSat33C-49  
MmaSat33D-49  
MmaSat33E-46

Consensus  
MmaSat34A-63  
MmaSat34B-61  
MmaSat34C-55  
MmaSat34D-65  
MmaSat34E-58  
MmaSat34F-65  
MmaSat34G-54  
MmaSat34H-61  
MmaSat34I-63  
MmaSat34J-63  
MmaSat34K-61  
MmaSat34L-62  
MmaSat34M-62  
MmaSat34N-54  
MmaSat34O-63

Consensus  
MmaSat35A-41  
MmaSat35B-39  
MmaSat35C-37  
MmaSat35D-39  
MmaSat35E-39  
MmaSat35F-39  
MmaSat35G-37

Consensus  
MmaSat38A-54  
MmaSat38B-50

Consensus  
MmaSat41A-29  
MmaSat41B-29

Consensus  
MmaSat42A-67  
MmaSat42B-67

Consensus  
MmaSat46B-34  
MmaSat46A-37

Consensus  
MmaSat51A-30  
MmaSat51B-30

Consensus  
MmaSat54A-16  
MmaSat54B-16  
MmaSat54C-16

Consensus  
MmaSat56A-35  
MmaSat56B-35  
MmaSat56C-35

Consensus  
MmaSat57A-30  
MmaSat57B-30  
MmaSat57C-35

(48) Consensus 1 10 20 30 40 50 60 70 72  
MmaSat58A-71 T T E G T G G C C C T T A A G T T C T G G C T G A G G A A A G G A C T C G T A G C G T A G T C G A C T C T G T T A A G C A G G C T  
MmaSat58B-71 G T T G C T G G C C C T T A A G T T C G G C T G A G G A A A G G A C T C G T A G C G T A G T C G A C T C T G T T A A G C A G G C T  
MmaSat58C-72 G T T G T G G C C C T T A A G T T C G G C T G A G G A A A G G A C T C T A G C G T A G T C G A C T C T G T T A A G C A G G C T

(49) Consensus 1 10 20 30 40 43  
MmaSat59A-40 T T T A A T T A A G T T T G G A G G G T C C A G T T - A G A G C A G G G G T  
MmaSat59B-41 T T T A A T T A G A T C A C T A G T T C C A G T T - A G A G C A G G G G T  
MmaSat59C-42 T T T A A T T A G A T C C C G T A G C G T C C A G T T - A G A G C A G G G G T  
MmaSat59D-40 T T T A A T T A G A T T C A G T A C G G T C C A G T T - A G A G C A G G G G T  
MmaSat59E-39 T T T A A T T A G A G - T C A G T T C G T C C A G T T - A G A G C A G G G T  
MmaSat59F-39 T T T A A T T A G A G - T C A G T A G C G T C C A G T T - A G A G C A G G G G T  
MmaSat59G-38 T T T A A T T A G A G - T C A G T - C G G T C A G T T - A G A G C A G G G G T

(50) Consensus 1 10 20 30 40 50 60 62  
MmaSat62A-61 - G T A A T A C A G T G T T C A G G T A C T T A C T G A A C C T C T G C T G A A C T C T A C A G G C T T A T T A G T  
MmaSat62B-61 - G T A A T A C A G T G T T C A G G T A T G T T A C T G A A C C T C T G C T G A G A G T C T A C A G G C T T A T T A G T  
MmaSat62C-61 - G T A A T A C A G T G T T C A G G T A T G T T A C T G A A C C T C T G C T G A G A G T C T A C A G G C T T A T T A G T  
MmaSat62D-61 - G T A A T A C A G T G T T C A G G T A T G T T A C T G A A C C T C T G C T G A G A G T C T A C A G G C T T A T T A G T  
MmaSat62E-61 - G T A A T A C A G T G T T C A G G T A T G T T A C T G A A C C T C T G A G A G T C T A C A G G C T T A T T A G T

(51) Consensus 1 10 20 30 40 43 47  
MmaSat63A-47 T C C T G A T T T A G T G C C G T C C T G T G T T C C T C A G C G A T C T G A C C G G A  
MmaSat63B-47 T C C T G A T T T A G T G C C G T C C T G T G T T C C T C A G C G A T C T G A C C G G A  
MmaSat63C-47 T C C T G A T T T A G T G C C G T C C T G T G T T C C T C G A C T C G G A C - - -  
MmaSat63D-47 T C C T G A T T T A G T G C C G T C C T G T G T T C C T C A G C G A T C T G G A C C G G A  
MmaSat63E-47 T C C T G A T T T A G T G C C G T C C T G T G T T C C T C A G C G A C T C G G A C C G G A  
MmaSat63F-47 T C C T G A T T T A G T G C C G T C C T G T G T T C C T C A G C G A C T C G G A C C G G A  
MmaSat63G-47 T C C T G A T T T A G T G C C G T C C T G T T C C T C A G C G A C T C T G A C C G G A

(52) Consensus 1 10 20 30 40 46  
MmaSat69A-42 G C T G G A G C A G T G T G T A G A G T T T A A G T G T G T G T G T C T  
MmaSat69B-38 G C T G G A G C A G T G T G T A G A G T T T A A - - - G T G T G T G G T C T  
MmaSat69C-38 G C T G G A G C A G T G T G T A G A G T T T A A - - - G T G T G T G G T C T  
MmaSat69D-42 G C T G G A G C A G T G T G T A G A G T T T A A G T G T G T G T G T C T  
MmaSat69E-38 G C T G G A G C A G T G T G T A G A G T T T A A G T G T G T G T G T C T  
MmaSat69F-42 G C T G G A G C A G T G T G T A G A G T T T A A G T G T G T G T G G G G  
MmaSat69G-38 G C T G G A G C A G T G T G T A G A G T T T A A - - - G T G T G T G T G T C T  
MmaSat69H-46 G C T G G A G C A G T G T G T A G A G T T T A A G T G T G T G T G T C T  
MmaSat69I-40 G C T G G A C A G T G T G T A G A G T T T A A G T G T G T G T G T C T  
MmaSat69J-38 G C T G G A G C A G T G T G T A G A G T T T A A - - - G T G T G T G T G T C T

(53) Consensus 1 10 20 30 40 44  
MmaSat70A-44 T G A C C T C T C A G A C A G T C G T G T A G T G T A A C A G G T A T A A A G A C C  
MmaSat70B-44 T G A C C A C T C G A C A G T G T G T A G T G T A A C A G G T A T A A A G A C C  
MmaSat70C-44 T G A C C A C T C A G A C A G T C G T G T A G T G T A A C A G G T A T A A A G A C C  
MmaSat70D-44 T G A C C A C T C A C A G T C G T G T A G T G T A A C A G A A A A C C  
MmaSat70E-44 T G A C C A C T C A C A G T C G T G T A G T G T A A C A G A A A A C C

(54) Consensus 1 10 20 30 37  
MmaSat71A-37 A C G G A T A A A C G T G T C T G T A A C T G A T A G G G  
MmaSat71B-37 T C C G A G T A T A A C A G T C T G T A G T A G C T G A T A G A G G  
MmaSat71C-37 T C C G A G T A T A A C A G T C T G T A G T A G C T G A T A G A G G  
MmaSat71D-35 T C T G G A T A A C - - T G T C T G T A A C T G A T A G A G G  
MmaSat71E-37 T C T G A G T A T A A C A G T G T C T G T A A C T G A T A G G G

(55) Consensus 1 10 20 30 40 50 59  
MmaSat76A-58 G A G - G G T G A G G G T C T G C T C T G A C T G T G A G A C T G A G C A C T G T G A G T G A T G G G T G T G  
MmaSat76B-59 G A G A G G T G A G G G T C T G C T C T G A C T G T G A G A C T G A G C A C T G T G A G T G A T G G G T G T G

(56) Consensus 1 10 20 31  
MmaSat78A-31 C C A C T G G A C T C T G G A G T G G T A A A G C C G  
MmaSat78B-31 C C A C T G G A C T C T G G A G T G G T A A A G C C C A

(57) Consensus 1 10 20 30 40  
MmaSat79A-38 A A C T A A A C A T A C A T T T A C A C A - - T T A T T A T T T A T T T A C  
MmaSat79B-40 A A C T A A A C A T A C A T T T A C A C A T T A T T A T T A T T T A C

(58) Consensus 1 10 20 29  
MmaSat80A-29 T A C T T A C A C A G T G A T C A G A G T C A G T G A  
MmaSat80B-27 T A C T T A C A C A G T G A T C A G A G T C A G T - -  
MmaSat80C-27 G A - - T A C A C A G T G A T C C A G A G T C A G T G A  
MmaSat80D-28 T A C T A C A C A G T G A T C C A G A G C A - T G

(59) Consensus 1 10 20 30 40 50 58  
MmaSat83A-58 T C A A T T A C A T A T A T A C A G T T A T T A C A G T T T A C A G T C T G A G T A C T G A A C T C T C  
MmaSat83B-58 T C A A T T A C A T A T A T A C A G T T A T T A C A G T T T A C A G T C T G A G T A C T G A A C T C T C

(60) Consensus 1 10 20 30 40 50 60 68  
MmaSat84A-65 T A A A C C C T G A G T A G A C T G A T A A A T C A A T G - - - G A T C A G T T A T A A T C T C A G G T T A C T G A G C T C T G  
MmaSat84B-68 T A A A C C C T G A G T A G A C T G A T A A A T C A A T G A T A G A C A G T T A T A A T C T G C T T A C T G A G C T C T G  
MmaSat84C-68 T A A A C C C T G A G T A G A C T G A T A A A T C A A T G T G A T A G A C A G T T A T A A T C T C A G T T A C T G A G C T C T G  
MmaSat84D-67 T A A A C C C T G A G T A G A C T G A T A A A T C A A T G T - A T G A T C A G T T A T A A T C T C A G T T A C T G A G C T C T G

(61) Consensus 1 10 20 30 40 42  
MmaSat86A-42 G T C A G T C C A T T C A G T G G T T G A G G T T C T G G A C T C T G T  
MmaSat86B-42 G T C A G T C C A T T C A G T G T T G A G G T T C T G G A C T C T G G G T G  
MmaSat86C-42 G T C A G T C C A T T A G T G T T A G G T T C T G G A C T C T G G G T G

(62) Consensus 1 10 20 30 40 50 60  
MmaSat91A-60 T G T G C T A A A C A C A T A T T T A A A C T A G G C T G A G T C C A A A C C C C T C T G T A P C C C T C C A  
MmaSat91B-60 T G T G C C T A A A C A C A T A T T T A A A C T A G G C T G A G T C C A A A C C C C T C T G T A T C T G T G A  
MmaSat91C-60 T G T G C C T A A A C A C A T A T T T A A A C G G T A G T C C A A A C C C C T C T G T G T C C C C T C A  
MmaSat91D-60 T G T G C C T A A A C A C A T A T T T A A A C G C A G C T G A G T C C A A A C C C C T C T G T A T C C C T C C A  
MmaSat91E-60 T G T G C C T A A A C A C A T A T T T A A A C G T A G T A G T A G T A G T C C A A A C C C C T C T G T A C C C C C A  
MmaSat91F-60 T G T G C C T A A A C A C A T A T T T A A A C T A G G C T G A G T C C A A A C C C C T C T G T G C C T C T C

(63) Consensus 1 10 20 30 40 46  
MmaSat92A-46 G T A T A T G C A G C T C A A A C A G C C G G A T A G A A A C C A G C T A G C T A C A  
MmaSat92B-46 G T A T A T G C A G C T C A A A A G C C G G A T A G A A A C C A G A T A G C T A C A  
MmaSat92C-46 G T A T A T G C A C A C T C A A A C A G C C G G A T A G A A A C C A G A T A G C T A C A  
MmaSat92D-46 G T A T A T G C A C A T C A A C A G C C G A C A G A A A C C A G A T A G C T A C A  
MmaSat92E-46 G T A T A T G C A C A A C A G C C G G A T A G A A A C C A G A T A G C T A C A  
MmaSat92F-46 G T A T A T G A C T C A A A C A G C C G G A T A G A A A C C A G A T A G C T A C A  
MmaSat92G-46 G T A T A T G A C C T C A A A C A G C C G G A T A G A A A C C A G A T A G C T A C A  
MmaSat92H-46 G T A T A T G A G T A A A C A G C C G G A T A G A A A C C A G C T A G C T A C A  
MmaSat92I-46 G T A T A T G A A C T C A A A C A G C C G C C A G A A A C C A G A T A G C T A C A  
MmaSat92J-46 G T A T A T G C A G C T C A A A C A G C C A T T A G A A A C C A G A T A G C T A C A  
MmaSat92K-46 G T A A G C A G C T A A A C A G C C A T T A G A A A C C A G A T A G C T A C A

(63) Consensus 1 10 20 30 41  
MmaSat95A-41 TATA TACTCTACTCTGATTTCTTTCAGATCTCTCAAT  
MmaSat95B-41 TATA TACTCTACTCTGATTTCTTTCAGATCTCTCAAT

(64) Consensus 1 10 20 30 40 50 54  
MmaSat96A-47 GAGTCGAGAGACCGAACATGACAGTTATGTTAGATAACA CTAGAG  
MmaSat96B-50 G---CAGAGAGCTTAAACATGTTTATCTGTAGATAACA CTAGAGGCGG  
MmaSat96C-47 GAGTCAGAGGCGTTAAACATGACAGTTATCTGTAGATAACA CTAGAG

(65) Consensus 1 10 20 30 39  
MmaSat97A-39 GCTCACACCAACCCCTACAACATTCACCTTCAACCA  
MmaSat97B-39 GCTCACAGCTCAACCCCTACAACATTCACCTTCAACCA  
MmaSat97C-39 GCTCACAGCTCAACCCCTACAACATTCACCTTCAACCA

(66) Consensus 1 10 20 30 37  
MmaSat98A-37 TAACTCTTCAGACTGTGGGAGTTGTGCTGCTG  
MmaSat98B-37 CTAACTCTTCAGACTGTGGGAGTTGTGCTGCTG  
MmaSat98C-37 CTAACTCTTCAGACTGTGGGAGTTGTGCTGCTG  
MmaSat98D-37 CTAACTCTTCAGACTGTGGGAGTTGTGCTGCTG  
MmaSat98E-37 CTAACTCTTCAGACTGTGGGAGTTGTGCTGCTG  
MmaSat98F-37 CTAACTCTTCAGACTGTGGGAGTTGTGCTGCTG  
MmaSat98G-37 CTAACTCTTCAGACTGTGGGAGTTGTGCTGCTG

(67) Consensus 1 10 20 30 33  
MmaSat99A-31 AGCGGAGTATGTTAGTGTCTGTGTA-TGAA  
MmaSat99B-33 AGCACAGATATGTTAGTGTCTGTGTA-TGAA  
MmaSat99C-30 AGCAAGATATGTTAGTGTCTGTGTA-TGAA  
MmaSat99D-31 AGCGGAGTATGTTAGTGTCTGTGTA-TGAA  
MmaSat99E-30 AGCACAGATATGTTAGTGTCTGTGTA-TGAA

(68) Consensus 1 10 20 30 40 50 60 64  
MmaSat100A-60 TGTGTGGGACTCAGTCTGGGTTTG---ATGTAATGTA TGTACTAAGCTGTAGGGAATGCGAGG  
MmaSat100B-45 TGTGTGGGACTCAGTCTGGGTTTG---ATGTAATGTA TGTACTAAGCTGTAGGGAATGCGAGG  
MmaSat100C-56 TGTGTGGGACTCAGTCTGGGTTTG---ATGTAATGTA TGTACTAAGCTGTAGGGAATGCGAGG  
MmaSat100D-60 TGTGTGGGACTCAGTCTGGGTTTG---ATGTAATGTA TGTACTAAGCTGTAGGGAATGCGAGG

(69) Consensus 1 10 20 30 34  
MmaSat111A-33 AATTGGC TAGTCTGATTTAGTGTGCTTAAT  
MmaSat111B-33 AATTGGC TAGTCTGATTTAGTGTGCTTAAT  
MmaSat111C-33 AATTGGC TAGTCTGATTTAGTGTGCTTAAT

(70) Consensus 1 10 20 30 40 50 52  
MmaSat113A-52 CCTGTAACTGTTA---CTTTCTAAA CTAAGGGAAGTTTACTGTTGTTACTGAA  
MmaSat113B-52 CCTGTAACTGTTA---CTTTCTAAA CTAAGGGAAGTTTACTGTTGTTACTGAA  
MmaSat113C-52 CCTGTAACTGTTA---CTTTCTAAA CTAAGGGAAGTTTACTGTTGTTACTGAA  
MmaSat113D-52 CCTGTAACTGTTA---CTTTCTAAA CTAAGGGAAGTTTACTGTTGTTACTGAA  
MmaSat113E-52 CCTGTAACTGTTA---CTTTCTAAA CTAAGGGAAGTTTACTGTTGTTACTGAA

(71) Consensus 1 10 20 30 40 45  
MmaSat115A-41 --AGTTTAGTCTGATTCAGTGAATAGGTCAGCAGG--TATA TTC  
MmaSat115B-43 --AGTTTAGTCTGATTCAGTGAATAGGTCAGCAGG--TATA TTC  
MmaSat115C-43 --AGTTTAGTCTGATTCAGTGAATAGGTCAGCAGG--TATA TTC

(72) Consensus 1 10 20 30 40 45  
MmaSat117A-44 GTA AAGTGA---CTGAGTTACAGAGAGATGTTTATAA---GTGTA  
MmaSat117B-41 GTA AAGTGA---CTGAGTTACAGAGAGATGTTTATAA---GTGTA  
MmaSat117C-41 GTA AAGTGA---CTGAGTTACAGAGAGATGTTTATAA---GTGTA  
MmaSat117D-44 GTA AAGTGA---CTGAGTTACAGAGAGATGTTTATAA---GTGTA  
MmaSat117E-44 GTA AAGTGA---CTGAGTTACAGAGAGATGTTTATAA---GTGTA  
MmaSat117F-42 GTA AAGTGA---CTGAGTTACAGAGAGATGTTTATAA---GTGTA  
MmaSat117G-40 GTA AAGTGA---CTGAGTTACAGAGAGATGTTTATAA---GTGTA  
MmaSat117H-42 GTA AAGTGA---CTGAGTTACAGAGAGATGTTTATAA---GTGTA  
MmaSat117I-44 GTA AAGTGA---CTGAGTTACAGAGAGATGTTTATAA---GTGTA  
MmaSat117J-42 GTA AAGTGA---CTGAGTTACAGAGAGATGTTTATAA---GTGTA  
MmaSat117K-42 GTA AAGTGA---CTGAGTTACAGAGAGATGTTTATAA---GTGTA  
MmaSat117L-43 GTA AAGTGA---CTGAGTTACAGAGAGATGTTTATAA---GTGTA

(73) Consensus 1 10 20 30 40 50 60 70  
MmaSat119A-70 TGAAGGGGTACCAGAAGTAACTAAGTAGTTAGGTGAGATGTCACGATCTGAGGAGGGGGTGGTTC  
MmaSat119B-70 TGAAGGGGTACCAGAAGTAACTAAGTAGTTAGGTGAGATGTCACGATCTGAGGAGGGGGTGGTTC

(74) Consensus 1 10 20 30 32  
MmaSat120B-32 CACCAACACTGTTCTTCATCC-TTATCAT  
MmaSat120A-31 CACCAACACTGTTCTTCATCC-TTATCAT

(75) Consensus 1 10 20 30 40 45  
MmaSat121A-45 ACCTGCTGTTTACTAGTGAATAACAGTCAAGGGATTATTTTAC  
MmaSat121B-45 ACCTGCTGTTTACTAGTGAATAACAGTCAAGGGATTATTTTAC  
MmaSat121C-45 ACCTGCTGTTTACTAGTGAATAACAGTCAAGGGATTATTTTAC  
MmaSat121D-45 ACCTGCTGTTTACTAGTGAATAACAGTCAAGGGATTATTTTAC  
MmaSat121E-45 ACCTGCTGTTTACTAGTGAATAACAGTCAAGGGATTATTTTAC  
MmaSat121F-45 ACCTGCTGTTTACTAGTGAATAACAGTCAAGGGATTATTTTAC  
MmaSat121G-45 ACCTGCTGTTTACTAGTGAATAACAGTCAAGGGATTATTTTAC  
MmaSat121H-43 ACCTGCTGTTTACTAGTGAATAACAGTCAAGGGATTATTTTAC  
MmaSat121I-45 ACCTGCTGTTTACTAGTGAATAACAGTCAAGGGATTATTTTAC  
MmaSat121J-45 ACCTGCTGTTTACTAGTGAATAACAGTCAAGGGATTATTTTAC  
MmaSat121K-45 ACCTGCTGTTTACTAGTGAATAACAGTCAAGGGATTATTTTAC  
MmaSat121L-45 ACCTGCTGTTTACTAGTGAATAACAGTCAAGGGATTATTTTAC  
MmaSat121M-45 ACCTGCTGTTTACTAGTGAATAACAGTCAAGGGATTATTTTAC  
MmaSat121N-45 ACCTGCTGTTTACTAGTGAATAACAGTCAAGGGATTATTTTAC

(76) Consensus 1 10 20 30 40 50 54  
MmaSat122A-54 CTA CAGAAATAAC CAGAGTACAGAGAAAGCAGAGACCGCTTACCACCA  
MmaSat122B-54 CTA CAGAAATAAC CAGAGTACAGAGAAAGCAGAGACCGCTTACCACCA  
MmaSat122C-54 CTA CAGAAATAAC CAGAGTACAGAGAAAGCAGAGACCGCTTACCACCA  
MmaSat122D-54 CTA CAGAAATAAC CAGAGTACAGAGAAAGCAGAGACCGCTTACCACCA  
MmaSat122E-54 CTA CAGAAATAAC CAGAGTACAGAGAAAGCAGAGACCGCTTACCACCA  
MmaSat122F-52 CTA CAGAAATAAC CAGAGTACAGAGAAAGCAGAGACCGCTTACCACCA

(77) Consensus 1 10 20 30 40 42  
MmaSat127A-42 A---CTGCTCAGAGGTTAGTATTAACCTTTTCTGAGTCTGCTC  
MmaSat127B-42 A---CTGCTCAGAGGTTAGTATTAACCTTTTCTGAGTCTGCTC  
MmaSat127C-42 ACCCTGCTCAGAGGTTAGTATTAACCTTTTCTGAGTCTGCTC  
MmaSat127D-42 ACCCTGCTCAGAGGTTAGTATTAACCTTTTCTGAGTCTGCTC  
MmaSat127E-42 ACCCTGCTCAGAGGTTAGTATTAACCTTTTCTGAGTCTGCTC  
MmaSat127F-42 ACCCTGCTCAGAGGTTAGTATTAACCTTTTCTGAGTCTGCTC

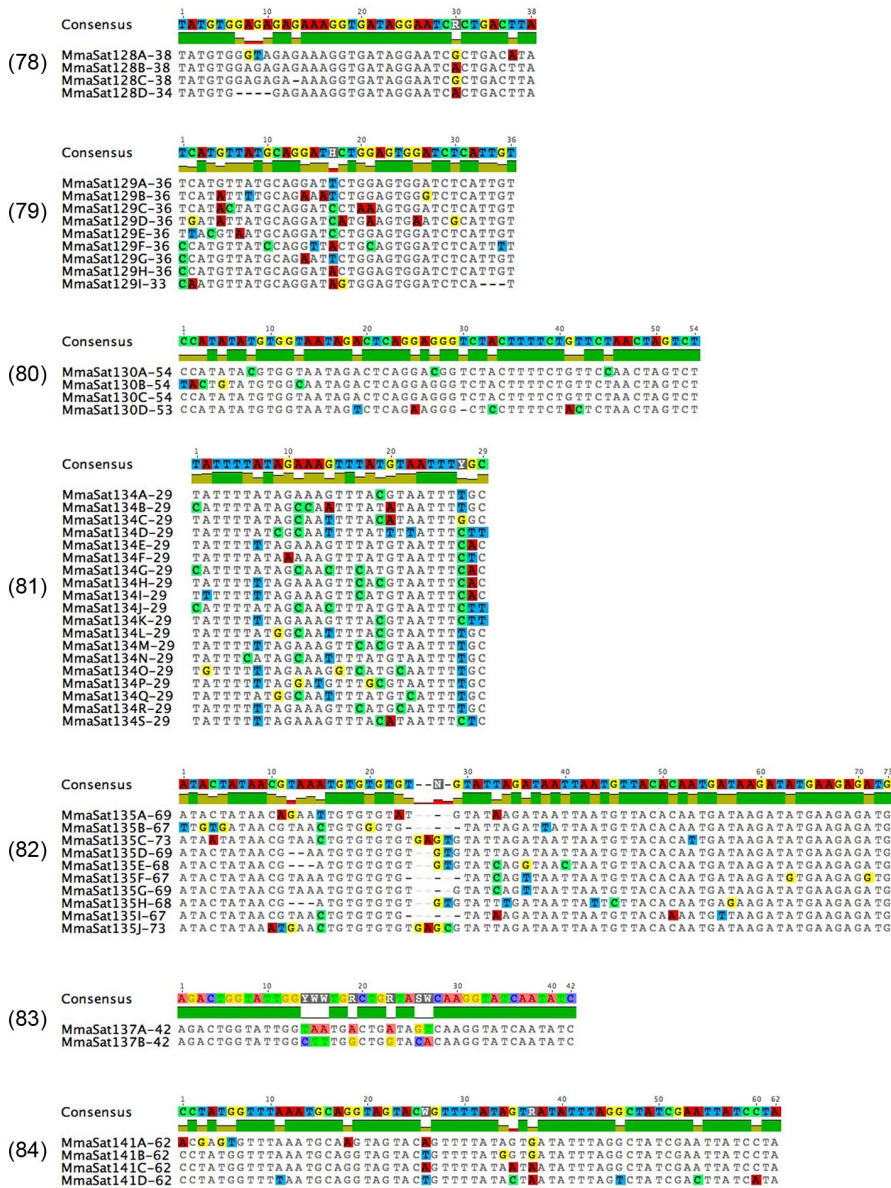

Supplementary Figure S2: Alignments of the different variants that represented several long (1-19) and short (20-84) satDNA families.

Consensus 1 10 20 30 40 50 53  
MmaSat156-53  
MmaSat09A-53  
MmaSat09B-53  
MmaSat09C-53  
MmaSat09D-53  
MmaSat09E-51

(SF1)

Consensus 1 50 100 150 200 250 300 350 400 450 500 550 600 649  
MmaSat10-236  
MmaSat064-235  
MmaSat043-247  
MmaSat109-210  
MmaSat075-250  
MmaSat124-237  
MmaSat065-246  
MmaSat067-217  
MmaSat087-248  
MmaSat055-196  
MmaSat136-245  
MmaSat050-246  
MmaSat089-234  
MmaSat074-246  
MmaSat108-235  
MmaSat106-282  
MmaSat103-324  
MmaSat068-353  
MmaSat030-482  
MmaSat020-482  
MmaSat019-435  
MmaSat066-611  
MmaSat090-620

(SF2)

Consensus 1 20 40 60 80 100 120 140 160 180 200 220 240 260 280 300 320 340 360 380 401  
MmaSat28-220  
MmaSat112A-388  
MmaSat112B-387

(SF3)

Consensus 1 10 20 30 40 50 52  
MmaSat139-47  
MmaSat113A-52  
MmaSat113B-52  
MmaSat113C-52  
MmaSat113D-52  
MmaSat113E-52

(SF4)

Consensus 1 10 20 30 40 50 60 67  
MmaSat164-67  
MmaSat118A-66

(SF5)

Consensus 1 20 40 60 80 100 120 140 160 180 200 220 240 260 280 300 320 340 360 380 400 412  
MmaSat140-330  
MmaSat77A-412  
MmaSat77B-411

(SF6)

Consensus 1 10 20 30 40 50 56  
MmaSat52-47  
MmaSat149-49  
MmaSat153-40  
MmaSat115A-41  
MmaSat115B-43  
MmaSat115C-43

(SF7)

Consensus 1 10 20 30 40 43  
MmaSat61-33  
MmaSat151-33  
MmaSat144-38  
MmaSat150-31  
MmaSat15A-39  
MmaSat15B-36  
MmaSat15C-39  
MmaSat15D-39  
MmaSat15E-36  
MmaSat15F-39  
MmaSat15G-39  
MmaSat15H-42  
MmaSat15I-39  
MmaSat15J-39  
MmaSat15K-36  
MmaSat15L-39  
MmaSat15M-39  
MmaSat15N-39  
MmaSat120B-32  
MmaSat120A-31

(SF8)

Consensus 1 10 20 30 40 50 54  
MmaSat131-45  
MmaSat38A-50  
MmaSat38B-54

(SF9)

Consensus 1 10 20 30 40 50 60 70 80 90 100 110 120 130 136  
MmaSat132-121  
MmaSat81-135

(SF10)

Consensus 1 10 20 30 33  
MmaSat146-33  
MmaSat143-27  
MmaSat32A-33  
MmaSat32B-33

(SF11)

Consensus 1 10 20 30 40 50 60 70 72  
MmaSat141A-62  
MmaSat141B-62  
MmaSat141C-62  
MmaSat141D-62  
MmaSat43A-67  
MmaSat43B-67  
MmaSat145-67

(SF12)

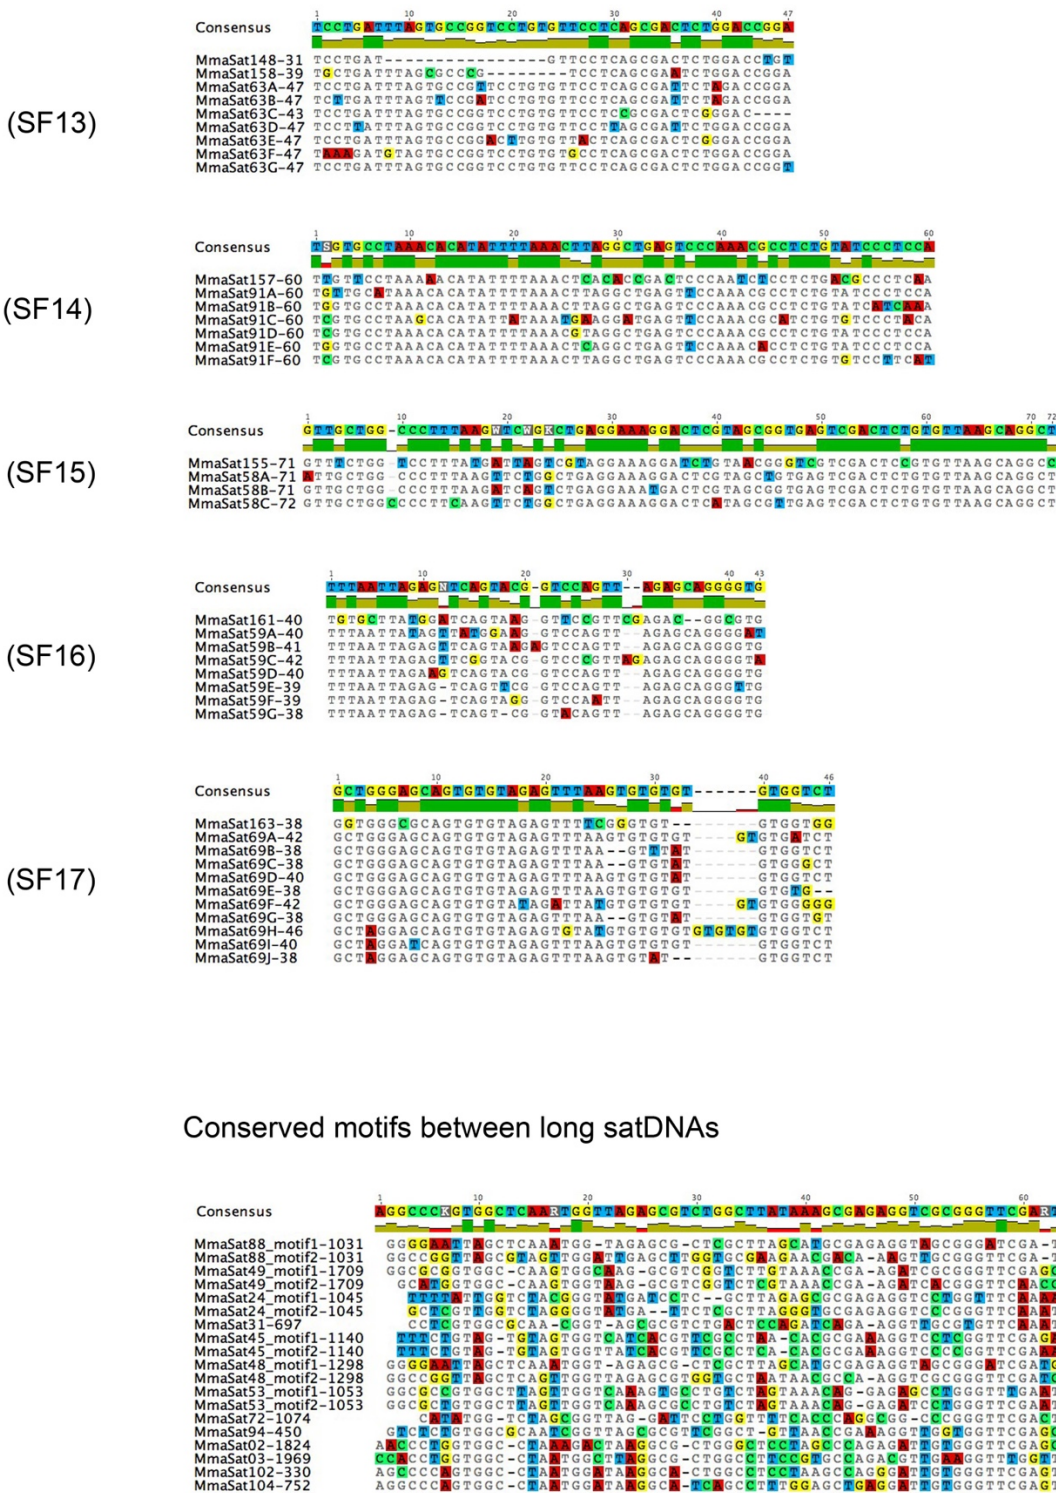

Supplementary Figure S3: Alignments between sequences from the characterized superfamilies.



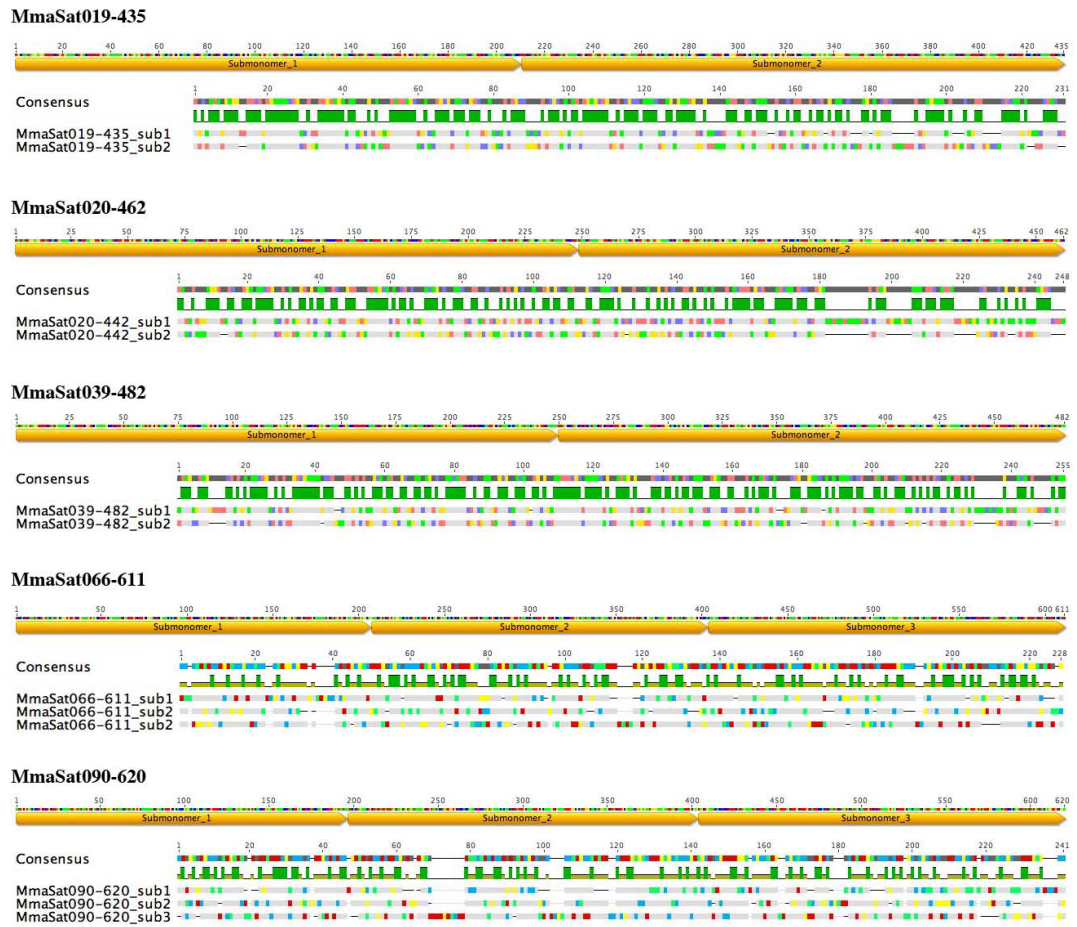

**Supplementary Figure S4:** Alignment of the five satDNA families included in MmaSF4. Yellow arrows indicate subrepeats.

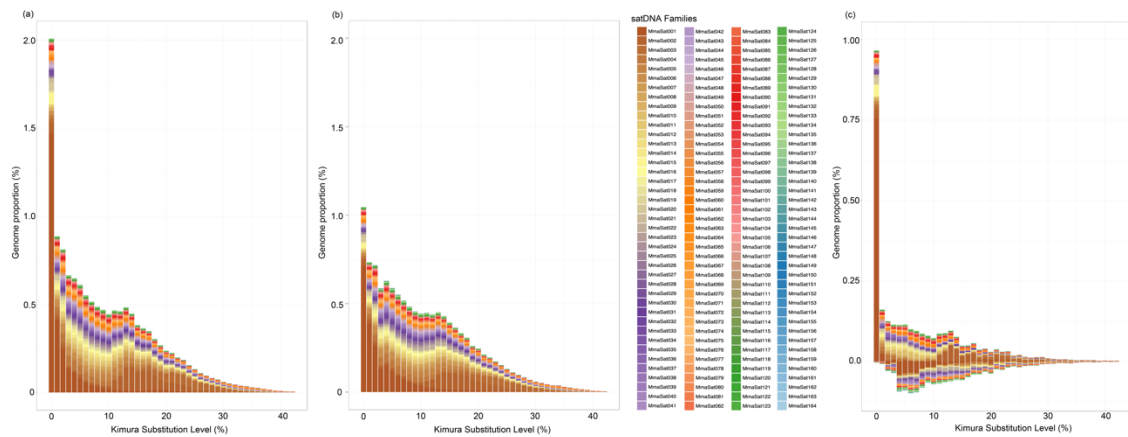

**Supplementary Figure S5:** Repeat landscapes showing the abundance and divergence profiles for all satDNAs identified in the *M. macrocephalus* female (a) and male (b) specimens, and a subtractive repeat landscape that was obtained by calculating the differences between the male and female counts, which indicates the enrichment of several satDNAs in the female sample that are putatively located on the W chromosome (c).

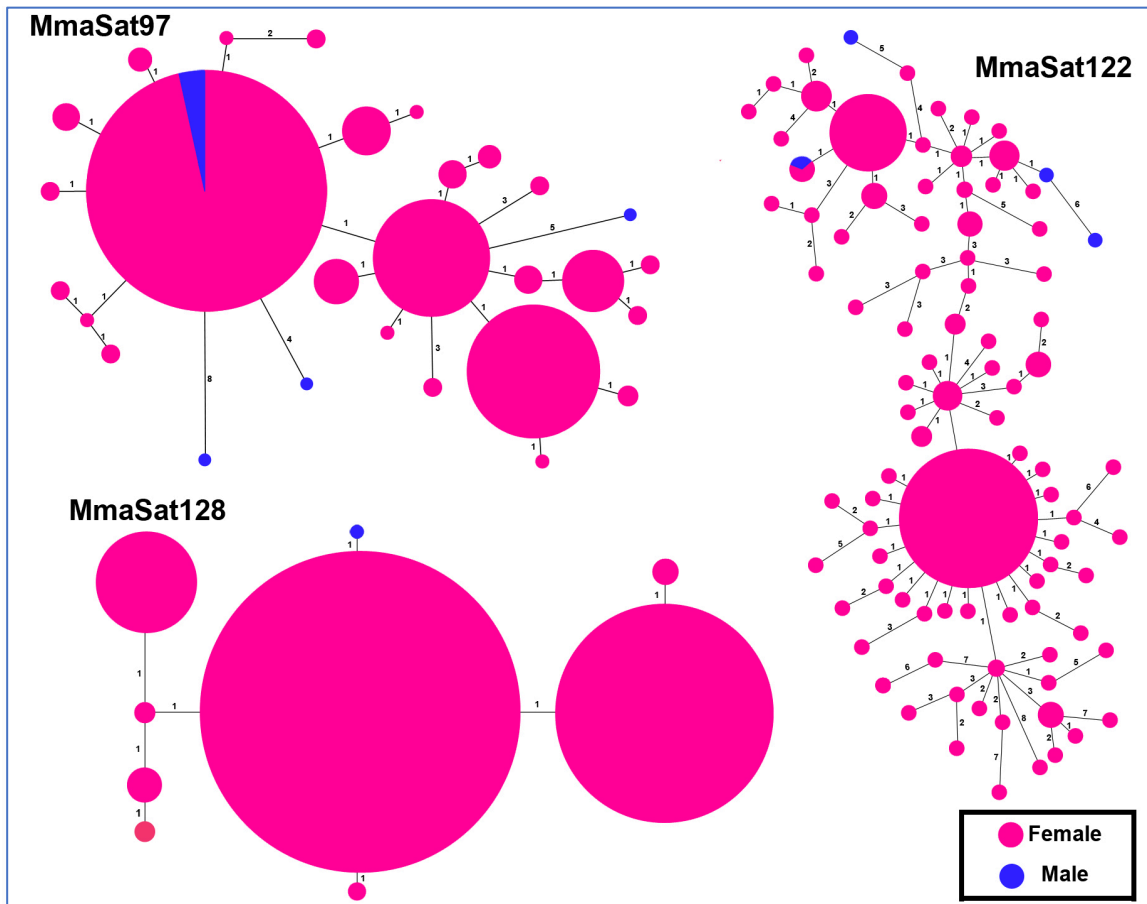

**Supplementary Figure S6:** Minimum spanning trees (MSTs) showing the relationships between the different haplotypes of MmaSat97, MmaSat122 and MmaSat128 obtained from Illumina reads from males (blue) and females (pink). The diameter of the circles is proportional to their abundance and the numbers represent the number of mutational steps.

|              |   |    |    |    |    |    |    |   |   |   |   |   |   |   |   |   |   |   |   |   |   |   |   |   |   |   |   |   |   |   |   |   |   |   |   |   |   |   |   |   |   |   |   |   |   |   |   |   |   |   |   |
|--------------|---|----|----|----|----|----|----|---|---|---|---|---|---|---|---|---|---|---|---|---|---|---|---|---|---|---|---|---|---|---|---|---|---|---|---|---|---|---|---|---|---|---|---|---|---|---|---|---|---|---|---|
|              | 1 | 10 | 20 | 30 | 40 | 50 | 52 |   |   |   |   |   |   |   |   |   |   |   |   |   |   |   |   |   |   |   |   |   |   |   |   |   |   |   |   |   |   |   |   |   |   |   |   |   |   |   |   |   |   |   |   |
| MmaSat85-52  | T | A  | T  | T  | G  | A  | G  | G | T | G | T | T | T | A | T | A | G | A | C | T | C | C | T | A | T | T | C | T | A | G | T | G | T | A | T | A | G | G | A | G | T | G | T |   |   |   |   |   |   |   |   |
| ApaSat29-52  | T | A  | T  | T  | G  | A  | G  | G | T | T | G | T | T | T | A | T | G | G | A | C | T | A | A | T | A | T | C | T | C | C | T | A | T | T | C | T | A | G | T | G | T | A | T | A | G | G | A | G | T | G | T |
| CgomSat02-52 | T | A  | T  | T  | G  | A  | G  | G | T | T | G | T | T | T | A | T | G | G | A | C | T | A | A | T | A | T | C | T | C | C | T | A | T | T | C | T | A | G | T | G | A | T | A | T | A | G | T | G | T |   |   |

**Supplementary Figure S7:** Nucleotide alignment between MmaSat85-52 and its respective homologues in *Characidium gomesi* (CgoSat02-52) and *Astyanax paranae* (ApaSat29-52).

**Table S1:** Repeat unit length (RUL, in nt), A + T content (%), number of variants (V), abundance (% of the genome) in females (F) and males (M) and divergence (%) in females (F) and males (M) of all satDNA families and superfamilies (SF), each showing its own quotient between female and male abundance values (F/M). Asterisks indicate the satDNA families mapped through FISH.

| SF | satDNA         | RUL  | A + T | V  | Abundance (%) |           | Divergence |       | F/M    |
|----|----------------|------|-------|----|---------------|-----------|------------|-------|--------|
|    |                |      |       |    | Female        | Male      | Female     | Male  |        |
|    | MmaSat001-566  | 566  | 56.9  | 2  | 2.7828955     | 2.2219752 | 2.33       | 3.57  | 1.25   |
|    | MmaSat002-1824 | 1824 | 54.6  | 1  | 1.2957467     | 1.0811764 | 15.2       | 15.89 | 1.20   |
|    | MmaSat003-1969 | 1969 | 54.2  | 1  | 0.7739933     | 0.6412589 | 21.83      | 22.36 | 1.21   |
|    | MmaSat004-20   | 20   | 50    | 3  | 0.5449692     | 0.5126925 | 7.77       | 8.84  | 1.06   |
|    | MmaSat005-1201 | 1201 | 59.7  | 1  | 0.4234171     | 0.4233456 | 11.75      | 12.6  | 1.00   |
|    | MmaSat006-36   | 36   | 66.7  | 1  | 0.3554307     | 0.3698559 | 6.17       | 6.6   | 0.96   |
|    | MmaSat007-42   | 42   | 54.8  | 3  | 0.2955625     | 0.3100578 | 15.72      | 16.5  | 0.95   |
|    | MmaSat008-45   | 45   | 53.3  | 4  | 0.2940894     | 0.2094737 | 10.25      | 10.48 | 1.40   |
| 1  | MmaSat009-53*  | 53   | 58.5  | 5  | 0.2515902     | 0.1372152 | 9.15       | 10.23 | 1.83   |
| 2  | MmaSat010-236  | 236  | 63.6  | 12 | 0.2355172     | 0.2686966 | 8.13       | 10    | 0.88   |
|    | MmaSat011-37   | 37   | 56.8  | 1  | 0.2251984     | 0.1653774 | 7.08       | 7.41  | 1.36   |
|    | MmaSat012-50   | 50   | 54    | 4  | 0.2065817     | 0.1813352 | 13.11      | 14    | 1.14   |
|    | MmaSat013-45   | 45   | 44.4  | 4  | 0.1870465     | 0.1380625 | 9.96       | 10.85 | 1.35   |
|    | MmaSat014-1878 | 1878 | 60.8  | 1  | 0.1741413     | 0.1456353 | 7.91       | 10.11 | 1.20   |
| 8  | MmaSat015-39   | 39   | 56.4  | 14 | 0.1672695     | 0.1719599 | 12.55      | 13.33 | 0.97   |
|    | MmaSat016-51   | 51   | 80.4  | 2  | 0.1323421     | 0.1258244 | 5.31       | 5.86  | 1.05   |
|    | MmaSat017-72   | 72   | 57.9  | 6  | 0.1280005     | 0.0563025 | 9.01       | 9.7   | 2.27   |
|    | MmaSat018-62   | 62   | 71    | 4  | 0.126233      | 0.1323584 | 5.89       | 6.93  | 0.95   |
| 2  | MmaSat019-435  | 435  | 60.9  | 1  | 0.1192614     | 0.1018148 | -0.65      | 0.01  | 1.17   |
| 2  | MmaSat020-442  | 442  | 61.1  | 2  | 0.1155918     | 0.1091648 | 12.41      | 12.32 | 1.06   |
|    | MmaSat021-27   | 27   | 44.4  | 10 | 0.1129086     | 0.2035064 | 12.83      | 13.58 | 0.55   |
|    | MmaSat022-41   | 41   | 58.5  | 2  | 0.1117997     | 0.085009  | 9.22       | 10.26 | 1.32   |
|    | MmaSat023-17   | 17   | 58.8  | 2  | 0.1067554     | 0.1024796 | 17.37      | 15.66 | 1.04   |
|    | MmaSat024-1045 | 1045 | 58.2  | 1  | 0.1047098     | 0.1285669 | 8.16       | 8.9   | 0.81   |
|    | MmaSat025-22   | 22   | 59.1  | 1  | 0.1037866     | 0.0757158 | 9.6        | 10.6  | 1.37   |
|    | MmaSat026-25   | 25   | 60    | 4  | 0.0948755     | 0.129752  | 9.92       | 10.2  | 0.73   |
|    | MmaSat027-67   | 67   | 62.7  | 4  | 0.0900267     | 0.0879088 | 13.32      | 13.94 | 1.02   |
| 3  | MmaSat028-220  | 220  | 51.4  | 1  | 0.0893837     | 0.0699632 | 5.49       | 6.48  | 1.28   |
|    | MmaSat029-32*  | 32   | 46.9  | 8  | 0.0846975     | 0.0503739 | 14.12      | 15.34 | 1.68   |
|    | MmaSat030-38   | 38   | 47.4  | 28 | 0.082197      | 0.0612807 | 16.11      | 16.8  | 1.34   |
|    | MmaSat031-697  | 697  | 54.2  | 1  | 0.0792113     | 0.1005833 | 6.18       | 7.15  | 0.79   |
| 11 | MmaSat032-33   | 33   | 57.6  | 2  | 0.0791761     | 0.093751  | 8.93       | 9.89  | 0.84   |
|    | MmaSat033-49   | 49   | 55.1  | 5  | 0.0777897     | 0.0793178 | 10.81      | 11.45 | 0.98   |
|    | MmaSat034-63   | 63   | 60.3  | 15 | 0.0708584     | 0.0662731 | 8.82       | 9.71  | 1.07   |
|    | MmaSat035-41   | 41   | 53.8  | 7  | 0.0685827     | 0.0609549 | 14.48      | 15.09 | 1.13   |
|    | MmaSat036-74*  | 74   | 62.2  | 1  | 0.0683419     | 0.000202  | 6.42       | 26.04 | 338.55 |
|    | MmaSat037-85   | 85   | 64.7  | 1  | 0.0672261     | 0.1102712 | 6.07       | 7.01  | 0.61   |

|    |                 |      |      |    |           |           |       |       |       |
|----|-----------------|------|------|----|-----------|-----------|-------|-------|-------|
| 9  | MmaSat038-54    | 54   | 63   | 2  | 0.0670939 | 0.0823434 | 10.49 | 11.6  | 0.81  |
| 2  | MmaSat039-482   | 482  | 62.4 | 1  | 0.0650824 | 0.0925934 | 7.76  | 7.36  | 0.70  |
|    | MmaSat040-34    | 34   | 67.6 | 1  | 0.0637776 | 0.0865696 | 8.77  | 8.82  | 0.74  |
|    | MmaSat041-29    | 29   | 51.7 | 1  | 0.0634877 | 0.0502377 | 15.58 | 17.62 | 1.26  |
| 12 | MmaSat042-67    | 67   | 55.2 | 2  | 0.0631669 | 0.058297  | 12.46 | 12.8  | 1.08  |
| 2  | MmaSat043-247   | 247  | 62.3 | 1  | 0.0614941 | 0.0673189 | 10.7  | 9.83  | 0.91  |
|    | MmaSat044-5     | 5    | 50   | 1  | 0.0612175 | 0.0571754 | 20.61 | 22.76 | 1.07  |
|    | MmaSat045-1140  | 1140 | 49.6 | 1  | 0.0599637 | 0.0618178 | 3.93  | 5.21  | 0.97  |
|    | MmaSat046-37    | 37   | 64.9 | 2  | 0.0595762 | 0.0509323 | 10.48 | 10.86 | 1.17  |
|    | MmaSat047-177   | 177  | 66.1 | 9  | 0.0584642 | 0.0705339 | 12.19 | 12.7  | 0.83  |
|    | MmaSat048-1298* | 1298 | 49.2 | 1  | 0.0583764 | 0.0365778 | 6.3   | 7.51  | 1.60  |
|    | MmaSat049-1709  | 1709 | 52.8 | 1  | 0.0582143 | 0.0536612 | 4.87  | 6.48  | 1.08  |
| 2  | MmaSat050-246   | 246  | 61   | 4  | 0.0503393 | 0.0542129 | 9.86  | 10.35 | 0.93  |
|    | MmaSat051-30    | 30   | 46.7 | 2  | 0.0493721 | 0.0466131 | 10.41 | 11.6  | 1.06  |
| 7  | MmaSat052-47    | 47   | 46.8 | 1  | 0.0478542 | 0.0415941 | 11.36 | 12.78 | 1.15  |
|    | MmaSat053-1053  | 1053 | 54.6 | 1  | 0.0478078 | 0.0458397 | 4.29  | 5.04  | 1.04  |
|    | MmaSat054-16    | 16   | 62.5 | 3  | 0.047304  | 0.032146  | 10.7  | 11.91 | 1.47  |
| 2  | MmaSat055-196   | 196  | 65.3 | 1  | 0.0472614 | 0.0433075 | 22.59 | 24.01 | 1.09  |
|    | MmaSat056-35    | 35   | 51.4 | 3  | 0.0465856 | 0.0575559 | 12.49 | 14.15 | 0.81  |
|    | MmaSat057-30    | 30   | 53.3 | 3  | 0.0462878 | 0.0559884 | 18.03 | 18.04 | 0.83  |
| 15 | MmaSat058-71*   | 71   | 49.3 | 3  | 0.0444104 | 0.00608   | 9.57  | 9.95  | 7.30  |
| 16 | MmaSat059-40    | 40   | 55   | 7  | 0.0440792 | 0.045836  | 13.3  | 13.89 | 0.96  |
|    | MmaSat060-1683  | 1683 | 46.7 | 1  | 0.0429138 | 0.046064  | 4.34  | 4.77  | 0.93  |
| 8  | MmaSat061-33*   | 33   | 45.5 | 1  | 0.0428973 | 0.00878   | 10.86 | 12.19 | 4.89  |
|    | MmaSat062-61    | 61   | 60.7 | 5  | 0.0418853 | 0.04072   | 10.75 | 11.75 | 1.03  |
| 13 | MmaSat063-47*   | 47   | 42.6 | 7  | 0.0413418 | 0.000943  | 12.26 | 20.11 | 43.82 |
| 2  | MmaSat064-235   | 235  | 63   | 4  | 0.0412768 | 0.0565465 | 19.94 | 17.26 | 0.73  |
| 2  | MmaSat065-246   | 246  | 62.2 | 3  | 0.0404248 | 0.0333543 | 8.64  | 10.62 | 1.21  |
| 2  | MmaSat066-611   | 611  | 61.2 | 1  | 0.0400215 | 0.035666  | 8.54  | 8.71  | 1.12  |
| 2  | MmaSat067-217   | 217  | 61.2 | 2  | 0.0398557 | 0.038925  | 14.22 | 15.93 | 1.02  |
| 2  | MmaSat068-353   | 353  | 62   | 3  | 0.038825  | 0.041121  | 12.17 | 13.4  | 0.94  |
| 17 | MmaSat069-42    | 42   | 52.4 | 10 | 0.0385085 | 0.036769  | 10.9  | 10.89 | 1.05  |
|    | MmaSat070-44    | 44   | 52.3 | 5  | 0.038417  | 0.0267182 | 12.37 | 12.95 | 1.44  |
|    | MmaSat071-37    | 37   | 59.5 | 5  | 0.0382826 | 0.0337228 | 10.59 | 11.56 | 1.14  |
|    | MmaSat072-1074  | 1074 | 48   | 1  | 0.0378197 | 0.0423626 | 3.8   | 5.21  | 0.89  |
|    | MmaSat073-90    | 90   | 70   | 1  | 0.0370268 | 0.0452805 | 7.16  | 8.07  | 0.82  |
| 2  | MmaSat074-246   | 246  | 61.4 | 4  | 0.0367916 | 0.0456733 | 5.8   | 5.49  | 0.81  |
| 2  | MmaSat075-250   | 250  | 62.4 | 3  | 0.0354559 | 0.0377101 | 16.87 | 19.45 | 0.94  |
|    | MmaSat076-58    | 58   | 43.1 | 2  | 0.0347111 | 0.0293241 | 9.2   | 9.53  | 1.18  |
| 6  | MmaSat077-412   | 412  | 58.3 | 2  | 0.0346631 | 0.0306705 | 5.85  | 7.32  | 1.13  |
|    | MmaSat078-31    | 31   | 45.2 | 2  | 0.033754  | 0.0269558 | 12.67 | 13.73 | 1.25  |
|    | MmaSat079-38    | 38   | 84.2 | 2  | 0.0332361 | 0.0375719 | 6.06  | 6.46  | 0.88  |
|    | MmaSat080-29    | 29   | 58.6 | 4  | 0.0332255 | 0.027907  | 13.83 | 14.74 | 1.19  |

|    |                |      |      |    |           |           |       |       |       |
|----|----------------|------|------|----|-----------|-----------|-------|-------|-------|
| 10 | MmaSat081-135  | 135  | 40.7 | 1  | 0.0329628 | 0.0208064 | 14.8  | 15.53 | 1.50  |
|    | MmaSat082-626  | 626  | 53.2 | 1  | 0.0319518 | 0.0455395 | 7.08  | 8.24  | 0.70  |
|    | MmaSat083-58   | 58   | 67.2 | 2  | 0.031846  | 0.0223408 | 6.89  | 6.9   | 1.43  |
|    | MmaSat084-65   | 65   | 64.6 | 4  | 0.0309865 | 0.0300537 | 11.14 | 12.25 | 1.03  |
|    | MmaSat085-52   | 52   | 67.3 | 1  | 0.0309718 | 0.0352903 | 15.26 | 17.01 | 0.88  |
|    | MmaSat086-42   | 42   | 47.6 | 3  | 0.0308068 | 0.0228899 | 12.83 | 12.93 | 1.35  |
| 2  | MmaSat087-248  | 248  | 64.5 | 1  | 0.0306532 | 0.0378751 | 13.38 | 13.23 | 0.81  |
|    | MmaSat088-1031 | 1031 | 44.7 | 1  | 0.030538  | 0.0236998 | 5.72  | 7.52  | 1.29  |
| 2  | MmaSat089-234  | 234  | 64.1 | 2  | 0.0302708 | 0.023811  | 8.68  | 10.29 | 1.27  |
| 2  | MmaSat090-620  | 620  | 64.4 | 1  | 0.0298446 | 0.027355  | 10.66 | 9.94  | 1.09  |
| 14 | MmaSat091-60   | 60   | 56.7 | 6  | 0.0292001 | 0.019625  | 13.01 | 14.76 | 1.49  |
|    | MmaSat092-46*  | 46   | 54.3 | 11 | 0.0289438 | 0.00369   | 14.74 | 33.82 | 7.85  |
|    | MmaSat093-953  | 953  | 64.2 | 1  | 0.0287561 | 0.0343241 | 2.67  | 3.73  | 0.84  |
|    | MmaSat094-450  | 450  | 47.3 | 2  | 0.028475  | 0.0286817 | 6.65  | 8.03  | 0.99  |
|    | MmaSat095-41   | 41   | 68.3 | 2  | 0.0259822 | 0.0246235 | 8.61  | 11.26 | 1.06  |
|    | MmaSat096-47   | 47   | 57.4 | 3  | 0.0250987 | 0.0174162 | 13.27 | 9.89  | 1.44  |
|    | MmaSat097-39*  | 39   | 53.8 | 3  | 0.0243614 | 0.000274  | 10.39 | 14.26 | 88.87 |
|    | MmaSat098-37*  | 37   | 45.9 | 7  | 0.024099  | 0.0149463 | 13.69 | 15.41 | 1.61  |
|    | MmaSat099-31*  | 31   | 61.3 | 5  | 0.0234336 | 0.0131652 | 10.89 | 11.75 | 1.78  |
|    | MmaSat100-60   | 60   | 58.3 | 4  | 0.0230059 | 0.0226877 | 11.29 | 10.99 | 1.01  |
|    | MmaSat101-454  | 454  | 55.3 | 1  | 0.0217928 | 0.025184  | 6.49  | 8.16  | 0.87  |
|    | MmaSat102-330  | 330  | 53.6 | 1  | 0.0196101 | 0.0304302 | 7.87  | 8.68  | 0.64  |
| 2  | MmaSat103-324  | 324  | 63   | 3  | 0.0185744 | 0.0139772 | 1.13  | -0.01 | 1.33  |
|    | MmaSat104-752  | 752  | 57.2 | 1  | 0.0183448 | 0.019529  | 7.22  | 7.37  | 0.94  |
|    | MmaSat105-564  | 564  | 60.8 | 1  | 0.0178615 | 0.0222973 | 12.36 | 13.57 | 0.80  |
| 2  | MmaSat106-282  | 282  | 63.1 | 1  | 0.0178213 | 0.0151652 | 6.4   | 10.5  | 1.18  |
|    | MmaSat107-44*  | 44   | 54.6 | 1  | 0.0177503 | 0.0108991 | 5.84  | 7.03  | 1.63  |
| 2  | MmaSat108-295* | 295  | 60.3 | 1  | 0.0176559 | 0.0117116 | 6.92  | 9.63  | 1.51  |
| 2  | MmaSat109-210  | 210  | 61.4 | 1  | 0.0171549 | 0.0174661 | 9.02  | 12.69 | 0.98  |
|    | MmaSat110-1126 | 1126 | 55.8 | 1  | 0.0171146 | 0.0159967 | 11.92 | 12.23 | 1.07  |
|    | MmaSat111-33*  | 33   | 57.6 | 3  | 0.0170218 | 0.00486   | 16.72 | 30.69 | 3.50  |
| 3  | MmaSat112-387  | 387  | 59.4 | 2  | 0.0166205 | 0.0227629 | 7.49  | 7.11  | 0.73  |
| 4  | MmaSat113-52*  | 52   | 61.5 | 5  | 0.0166109 | 0.00126   | 12.05 | 18.25 | 13.18 |
|    | MmaSat114-211  | 211  | 67.3 | 4  | 0.0157794 | 0.0287923 | 15.04 | 15.94 | 0.55  |
| 7  | MmaSat115-41   | 41   | 58.5 | 3  | 0.0154695 | 0.0227717 | 13.31 | 13.07 | 0.68  |
|    | MmaSat116-1310 | 1310 | 62.7 | 1  | 0.0154613 | 0.0175173 | 11.98 | 12.13 | 0.88  |
|    | MmaSat117-44   | 44   | 61.4 | 12 | 0.0151687 | 0.0219488 | 10.07 | 9.55  | 0.69  |
| 5  | MmaSat118-66*  | 66   | 68.2 | 1  | 0.0150426 | 0.00952   | 9.16  | 10.05 | 1.58  |
|    | MmaSat119-70   | 70   | 54.3 | 2  | 0.0144711 | 0.0123729 | 8.85  | 9.93  | 1.17  |
| 8  | MmaSat120-31   | 31   | 61.3 | 2  | 0.014454  | 0.0119471 | 11.49 | 11.77 | 1.21  |
|    | MmaSat121-45   | 45   | 64.4 | 14 | 0.0131588 | 0.00893   | 11.81 | 12.63 | 1.47  |
|    | MmaSat122-54*  | 54   | 57.4 | 6  | 0.0130871 | 0.000266  | 9.96  | 16.68 | 49.17 |
|    | MmaSat123-152  | 152  | 55.9 | 7  | 0.0130834 | 0.0143146 | 8.6   | 9.5   | 0.91  |

|    |                |      |      |    |            |           |       |       |       |
|----|----------------|------|------|----|------------|-----------|-------|-------|-------|
| 2  | MmaSat124-237  | 237  | 62   | 1  | 0.0123884  | 0.0174618 | -3.59 | -2.53 | 0.71  |
|    | MmaSat125-1261 | 1261 | 54.9 | 1  | 0.0119073  | 0.0086    | 4.46  | 5.56  | 1.38  |
|    | MmaSat126-178  | 178  | 68   | 4  | 0.011842   | 0.0282457 | 11.86 | 11.97 | 0.42  |
|    | MmaSat127-42*  | 42   | 64.3 | 6  | 0.0114881  | 0.000682  | 10.8  | 25.76 | 16.85 |
|    | MmaSat128-38*  | 38   | 57.9 | 4  | 0.0110087  | 0.000373  | 9.47  | 15.14 | 29.53 |
|    | MmaSat129-36   | 36   | 58.3 | 9  | 0.0106561  | 0.0129946 | 12.47 | 14.28 | 0.82  |
|    | MmaSat130-54   | 54   | 61.1 | 4  | 0.0104615  | 0.00749   | 9.79  | 12.52 | 1.40  |
| 9  | MmaSat131-49   | 49   | 73.5 | 1  | 0.00978    | 0.00996   | 19.73 | 19.08 | 0.98  |
| 10 | MmaSat132-121  | 121  | 52.9 | 1  | 0.00943    | 0.00654   | 6.97  | 7.18  | 1.44  |
|    | MmaSat133-69   | 69   | 66.7 | 1  | 0.00935    | 0.0156122 | 12.41 | 12.13 | 0.60  |
|    | MmaSat134-29   | 29   | 79.3 | 19 | 0.00894    | 0.0256614 | 16.66 | 16.28 | 0.35  |
|    | MmaSat135-69   | 69   | 72.5 | 10 | 0.00856    | 0.0295993 | 10.6  | 9.65  | 0.29  |
| 2  | MmaSat136-245  | 245  | 62   | 1  | 0.00797    | 0.00895   | -0.28 | 0.01  | 0.89  |
|    | MmaSat137-42   | 42   | 64.3 | 2  | 0.00776    | 0.0122588 | 9.54  | 8.64  | 0.63  |
|    | MmaSat138-17   | 17   | 58.8 | 1  | 0.00547    | 0.0211971 | 9.62  | 6.16  | 0.26  |
| 4  | MmaSat139-47*  | 47   | 70.2 | 1  | 0.00503    | 0.000126  | 20.27 | 20.93 | 39.95 |
| 6  | MmaSat140-330  | 330  | 56.1 | 1  | 0.00479    | 0.00467   | 5.26  | 7.04  | 1.03  |
| 12 | MmaSat141-62   | 62   | 66.1 | 4  | 0.00442    | 0.0145375 | 12.77 | 9.96  | 0.30  |
|    | MmaSat142-16   | 16   | 56.2 | 1  | 0.00405    | 0.00334   | 12.8  | 13.13 | 1.21  |
| 11 | MmaSat143-27   | 27   | 63   | 1  | 0.00404    | 0.00325   | 16.05 | 13.79 | 1.24  |
| 8  | MmaSat144-16   | 16   | 50   | 1  | 0.0026     | 0.00218   | 25.1  | 23.12 | 1.20  |
| 12 | MmaSat145-67*  | 67   | 55.2 | 1  | 0.00111    | 0.00037   | 10.57 | 10.84 | 2.99  |
| 11 | MmaSat146-33   | 33   | 60.6 | 1  | 0.00103    | 0.000813  | 28.95 | 28.66 | 1.26  |
|    | MmaSat147-26   | 26   | 53.8 | 1  | 0.000857   | 0.00121   | 23.16 | 21.7  | 0.71  |
| 13 | MmaSat148-31   | 31   | 45.2 | 1  | 0.000812   | 0.000329  | 18.17 | 35.72 | 2.47  |
| 7  | MmaSat149-48   | 48   | 50   | 1  | 0.000774   | 0.00083   | 22.11 | 23.89 | 0.93  |
| 8  | MmaSat150-31*  | 31   | 58.1 | 1  | 0.000685   | 0.000319  | 15.86 | 21.31 | 2.15  |
| 8  | MmaSat151-33*  | 33   | 48.5 | 1  | 0.000646   | 0.000158  | 26.07 | 32.66 | 4.09  |
|    | MmaSat152-31*  | 31   | 61.3 | 1  | 0.000413   | 0.000211  | 29.91 | 31.53 | 1.96  |
| 7  | MmaSat153-40*  | 40   | 65   | 1  | 0.000377   | 0.0000733 | 26.6  | 15.54 | 5.14  |
|    | MmaSat154-30*  | 30   | 43.3 | 1  | 0.000305   | 0.000181  | 25.44 | 32.57 | 1.69  |
| 15 | MmaSat155-71*  | 71   | 50.7 | 1  | 0.000152   |           | 15.94 | -     | -     |
| 1  | MmaSat156-53   | 53   | 50.9 | 1  | 0.000128   | 0.000175  | 23.78 | 27.19 | 0.73  |
| 14 | MmaSat157-60   | 60   | 58.3 | 1  | 0.000124   | 0.000103  | 24.55 | 26.31 | 1.20  |
| 13 | MmaSat158-39*  | 39   | 41   | 1  | 0.0000928  |           | 26.05 | -     | -     |
|    | MmaSat159-37   | 37   | 29.7 | 1  | 0.0000437  | 0.000138  | 24.8  | 20.57 | 0.32  |
|    | MmaSat160-29   | 29   | 48.3 | 1  | 0.000032   | 0.0000909 | 13.52 | 28.1  | 0.35  |
| 16 | MmaSat161-40   | 40   | 47.5 | 1  | 0.00000693 | 0.0000821 | 37.05 | 28.83 | 0.08  |
|    | MmaSat162-48*  | 48   | 47.9 | 1  | 0.0000032  |           | 35.77 | -     | -     |
| 17 | MmaSat163-38   | 38   | 39.5 | 1  | 0.0000024  | 0.000132  | 18.39 | 22.22 | 0.02  |
| 5  | MmaSat164-67   | 67   | 68.7 | 1  | 0.00000187 | 0.0000221 | 22.84 | 29.11 | 0.08  |



**Table S2:** List of designed primers in this study

| satDNA         | Primer F (5'-3')       | Primer R (5'-3')       |
|----------------|------------------------|------------------------|
| MmaSat009-53   | CAACACCAGTACCTGACCT    | CATTGCTGTGAGGATTTGAT   |
| MmaSat017-72   | CTTACTGAGTTAATACAGCGC  | TGGTGTAAATGATCAGATTA   |
| MmaSat029-32   | GGTCTGATGGAACAACCTGCC  | ACCACACAGGATGGGCAGTT   |
| MmaSat036-74   | ACCTTGAAAGTGTCTGTCCA   | CAATAGTCCCCAAATACAGTTT |
| MmaSat048-1298 | AAACCCACCCAGACGTGTTT   | TCGGCCTGCTTCGTTTAAAGT  |
| MmaSat058-71   | TCACCGCTACGAGTCCTTTC   | GACTCTGTGTAAAGCAGGCT   |
| MmaSat061-33   | TCCTCACTACCAACACACG    | CAGGTATGCTGAGCGTGTG    |
| MmaSat063-47   | TGTTCCCTCAGCGACTCTGGA  | AGGACCGGCACTAAATCAGG   |
| MmaSat097-39   | AACATTCACTCTTACAACCA   | GTAGGGTTGAGCTGTGAGC    |
| MmaSat098-37   | AGCCTCCAGGACACTCAG     | TTGGGACTCTGTGCTGATG    |
| MmaSat099-31   | CAACAGCAACTACACATATC   | TTGATGAAAACACAGATAT    |
| MmaSat092-46   | CGGAATAGAAAACCAGCTA    | TGTTTGAGCTGCATTATAC    |
| MmaSat107-44   | ACACTAGAGCAGTTAGCTTT   | ATACACACATTAGCTCCGG    |
| MmaSat108-295  | TAGAACCGTCAGAACCGCTG   | GCCCGTCTGCTGCATAGTAA   |
| MmaSat111-33   | CTGAGTTGAGTTGTGAGTCA   | CAGACTAGCCAATTATTGAC   |
| MmaSat113-52   | GGAAGTTTACTGTGGTTACT   | TAGTTTAGGAAGGGTAACAG   |
| MmaSat118-66   | CAGTTACTCAGTACATGTAC   | AGTTACTACTCACCTCTGTA   |
| MmaSat122-54   | GTAATCTGGTTTATTTCTGTAG | GAAAAGCAGAGACGCTATGT   |
| MmaSat127-42   | TCATATCTCTGAACAGGAGG   | TTTACCTATTTGGAGTTATGC  |
| MmaSat128-38   | CCTTTCTCTCTCCACATA     | GATAGGAATCACTGACTTA    |
| MmaSat139-47   | GGAAGTTTACTGTGGTTACT   | TAGTTTAGGAAGGGTAACAG   |
| MmaSat145-67   | GTCAGAACTGTACGTCCACC   | AGAACAGCTTTTAGAGGTGG   |
| MmaSat150-31   | CATTCCTTTATCATCCGG     | ATGAAGGAACACTGTTCCG    |
| MmaSat151-33   | TGTCCACACTCATCAAAGA    | GGACAGGTATGCTGCTGGC    |
| MmaSat152-31   | GGTCTGATGGAACAACCTGCC  | ACCACACAGGATGGGCAGTT   |
| MmaSat153-40   | CATGACAATCAGACTAAACT   | TAAAGCTCAGGAGATATATC   |
| MmaSat154-30   | CTCGCTCAAACCAACTCCAG   | AGATGGTGTGTGGGCTGGA    |
| MmaSat155-71   | GCGAATCTGGACCGGATG     | GATTCGCTGAGGACGGGCG    |
| MmaSat158-39   | CCTTTCCTACGACTAATCA    | CCTTTCCTACGACTAATCA    |
| MmaSat162-48   | CCCTTCGCTCCCTACACA     | CTAACATAATGGCATACCCC   |
